# Supplementary material for: Development of a core outcome set for immunomodulation in pregnancy (COSIMPREG): a protocol for a systematic review and Delphi study
Source: PubMed Central journal article supplement — BMJ Open. 2018 Aug 5;8(8):e021619. doi: 10.1136/bmjopen-2018-021619 (PMC6078247; doi:10.1136/bmjopen-2018-021619), 2018-08-05
Supplement: bmjopen-2018-021619.draft_revisions.pdf [file bmjopen-2018-021619.draft_revisions.pdf]

# BMJ Open

BMJ Open is committed to open peer review. As part of this commitment we make the peer review history of every article we publish publicly available.

When an article is published we post the peer reviewers' comments and the authors' responses online. We also post the versions of the paper that were used during peer review. These are the versions that the peer review comments apply to.

The versions of the paper that follow are the versions that were submitted during the peer review process. They are not the versions of record or the final published versions. They should not be cited or distributed as the published version of this manuscript.

BMJ Open is an open access journal and the full, final, typeset and author-corrected version of record of the manuscript is available on our site with no access controls, subscription charges or pay-per-view fees (<http://bmjopen.bmj.com>).

If you have any questions on BMJ Open's open peer review process please email [info.bmjopen@bmj.com](mailto:info.bmjopen@bmj.com)

# BMJ Open

## Development of a Core Outcome Sets for IMmunomodulation in PREGnancy (COSIMPREG): a protocol for a systematic review and Delphi study

|                               |                                                                                                                                                                                                                                                                                                                                                                                                                                                                                                                                                                                                                                                                                                                                                                                                                        |
|-------------------------------|------------------------------------------------------------------------------------------------------------------------------------------------------------------------------------------------------------------------------------------------------------------------------------------------------------------------------------------------------------------------------------------------------------------------------------------------------------------------------------------------------------------------------------------------------------------------------------------------------------------------------------------------------------------------------------------------------------------------------------------------------------------------------------------------------------------------|
| Journal:                      | <i>BMJ Open</i>                                                                                                                                                                                                                                                                                                                                                                                                                                                                                                                                                                                                                                                                                                                                                                                                        |
| Manuscript ID                 | bmjopen-2018-021619                                                                                                                                                                                                                                                                                                                                                                                                                                                                                                                                                                                                                                                                                                                                                                                                    |
| Article Type:                 | Protocol                                                                                                                                                                                                                                                                                                                                                                                                                                                                                                                                                                                                                                                                                                                                                                                                               |
| Date Submitted by the Author: | 09-Jan-2018                                                                                                                                                                                                                                                                                                                                                                                                                                                                                                                                                                                                                                                                                                                                                                                                            |
| Complete List of Authors:     | Prins, Jelmer; University of Groningen, University Medical Center Groningen, Department of Obstetrics and Gynaecology<br>Holvast, Floor; University of Groningen, University Medical Center Groningen, Department of General Practice<br>Van 't Hooft, Janneke; University of Amsterdam, Department of Obstetrics and Gynaecology, Academic Medical Center<br>Ganzevoort, Jan; Academic Medical Center, Amsterdam, Department of Obstetrics and Gynaecology<br>Scherjon, Sicco ; University of Groningen, University Medical Center Groningen, Department of Obstetrics and Gynaecology<br>Robertson, Sarah; University of Adelaide, Robinson Research Institute and Adelaide Medical School<br>Gordijn, Sanne; University of Groningen, University Medical Center Groningen, Department of Obstetrics and Gynaecology |
| Keywords:                     | immune modulation, therapy, prevention, pregnancy, core outcome set, COS                                                                                                                                                                                                                                                                                                                                                                                                                                                                                                                                                                                                                                                                                                                                               |
|                               |                                                                                                                                                                                                                                                                                                                                                                                                                                                                                                                                                                                                                                                                                                                                                                                                                        |

SCHOLARONE™  
Manuscripts

1  
2  
3 1 Development of a Core Outcome Sets for IMmunomodulation in PREGnancy  
4  
5  
6 2 (COSIMPREG): a protocol for a systematic review and Delphi study  
7  
8

9  
10 3 *Author names and affiliations:*

11  
12 4 Jelmer R. Prins<sup>a,e</sup>

13  
14 5 Email address: [j.r.prins@umcg.nl](mailto:j.r.prins@umcg.nl)

15  
16 6 Floor Holvast<sup>b</sup>

17  
18 7 Email address: [f.holvast@umcg.nl](mailto:f.holvast@umcg.nl)

19  
20 8 Janneke van 't Hooft<sup>c</sup>

21  
22 9 Email address: [j.vanthoof@gmail.com](mailto:j.vanthoof@gmail.com)

23  
24 10 Wessel Ganzevoort<sup>c</sup>

25  
26 11 Email address: [j.w.ganzevoort@amc.uva.nl](mailto:j.w.ganzevoort@amc.uva.nl)

27  
28 12 Sicco A. Scherjon<sup>a</sup>

29  
30 13 Email address: [s.a.scherjon@umcg.nl](mailto:s.a.scherjon@umcg.nl)

31  
32 14 Sarah. A. Robertson<sup>d</sup>

33  
34 15 Email address: [sarah.robertson@adelaide.edu.au](mailto:sarah.robertson@adelaide.edu.au)

35  
36 16 Sanne J. Gordijn<sup>a</sup>

37  
38 17 Email address: [s.j.gordijn@umcg.nl](mailto:s.j.gordijn@umcg.nl)

39  
40 18 <sup>a</sup> University of Groningen, University Medical Center Groningen, Department of Obstetrics and Gynaecology, PO Box 30001,  
41 19 9700 RB Groningen, The Netherlands

42  
43 20 <sup>b</sup> University of Groningen, University Medical Center Groningen, Department of General Practice. PO Box 30001, 9700 RB  
44 21 Groningen, The Netherlands

45  
46 22 <sup>c</sup> University of Amsterdam, Department of Obstetrics and Gynaecology, Academic Medical Center, PO Box 22660, 1100 DD,  
47 23 Amsterdam, the Netherlands

48  
49 24 <sup>d</sup> Robinson Research Institute and Adelaide Medical School, University of Adelaide, Adelaide, SA, Australia

50  
51 25 <sup>e</sup> CORRESPONDENCE TO: Jelmer Prins: [j.r.prins@umcg.nl](mailto:j.r.prins@umcg.nl)

## 26 **Abstract**

27 **Introduction:** To establish pregnancy the maternal immune system must adapt to tolerate the semi-  
28 allogenic fetus. Less than optimal adaptation of the maternal immune system during (early) pregnancy is  
29 implicated in several complications of pregnancy. The development of effective immune modulation  
30 interventions as preventive or therapeutic strategies holds promise, and several studies sought to  
31 evaluate the safety and effectiveness of various approaches. However, a limitation is the high variability  
32 in clinical and immune outcomes that are reported. We therefore aim to develop a core outcome set for  
33 application to studies of immune modulation in pregnancy (COSIMPREG).

34 **Methods and analysis:** We will use a step-wise approach to develop a COS for immune modulation in  
35 pregnancy. First, we will perform a systematic review to identify reported outcomes. For this review  
36 PRISMA guidelines will be followed. Second, we will use the Delphi method to develop a preliminary  
37 COSIMPREG. In three rounds the outcomes of the systematic review will be scored. A panel comprising  
38 experts from relevant disciplines and diverse geographical locations will be assembled until a sufficient  
39 quality of the panel is reached. We will use predefined decision rules for outcomes. After each round  
40 outcomes, including scores, will be returned to the panel for further refinement. The outcomes not  
41 excluded after the third round will be taken to a consensus meeting. In this meeting experts from all  
42 relevant disciplines will discuss and finalize the COSIMPREG.

43 **Ethics and dissemination:** For this study no ethical approval is required. The systematic review will be  
44 published in an appropriate open access reproductive immunology journal. Once the COSIMPREG is  
45 finalised it will be published in an open access reproductive immunology journal, and disseminated at  
46 appropriate international meetings, as well as through relevant research and scientific societies. Experts  
47 involved in the Delphi study will be asked to give informed consent.

1  
2  
3  
4  
5  
6  
7  
8  
9  
10  
11  
12  
13  
14  
15  
16  
17  
18  
19  
20  
21  
22  
23  
24  
25  
26  
27  
28  
29  
30  
31  
32  
33  
34  
35  
36  
37  
38  
39  
40  
41  
42  
43  
44  
45  
46  
47  
48  
49  
50  
51  
52  
53  
54  
55  
56  
57  
58  
59  
60

48

49

**Key words: immune modulation, therapy, prevention, pregnancy, core outcome set, COS**

50

For peer review only

## 51 **Strengths and limitations of this study**

52

- 53 • The Delphi procedure involves experts from all relevant stakeholder groups including patients.
- 54 • The Delphi procedure allows unbiased contributions, and is anonymous.
- 55 • The systematic review and input of topic experts will assemble and synthesise evidence from a
- 56 broad, inclusive base.
- 57 • This protocol covers a topic which holds enormous potential for future reproductive medicine.
- 58 • The intention is to publish the results in open access journals to optimize dissemination.

## 59 Introduction

60 The maternal immune response is instrumental in pregnancy health <sup>1</sup>. Failure of the immune response  
61 to adapt and respond correctly to conception and embryo implantation is associated with, and likely  
62 plays a causal role in, most complications of pregnancy <sup>2</sup>. During early pregnancy the maternal immune  
63 system must adapt to tolerate the fetus and placenta, that both express maternal as well as paternal  
64 (foreign) antigens. Maladaptation of the maternal immune system has been associated with common  
65 complications of pregnancy including preterm birth, preeclampsia, fetal growth restriction, and  
66 recurrent miscarriages <sup>2-4</sup>. Various approaches to immunomodulation have been used for several  
67 indications to improve pregnancy outcome <sup>5</sup>. For example, a commonly used immune modulating  
68 therapy is acetylsalicylic acid (aspirin), which is widely used to prevent preeclampsia <sup>6</sup>. In other  
69 reproductive disorders, such as recurrent miscarriage, several approaches like paternal leukocyte  
70 immunization, progesterone, and steroids have been used with most of them no beneficial effect <sup>5</sup>.  
71 Immune-modulating therapeutic options are projected to improve, will become more tailored, and will  
72 be more common used in the next few years, with the development of several initiatives to achieve  
73 targeted, safe immunotherapy both as prevention and therapy for pregnancy complications.

74 In current literature, there is high variability in the different reported clinical outcomes and immunologic  
75 parameters. This variability hampers proper comparison across studies and harmonisation of data sets.  
76 Therefore, the objective of this study is to develop a core outcome set (COS) for studies investigating  
77 immunomodulation in pregnancy <sup>7,8</sup>. Although immunologic studies in pregnancy are usually condition  
78 based with associated condition specific outcomes, the COS developed in the current study will  
79 comprise the fundamental outcomes which are considered essential for reporting in all reproductive  
80 immunology studies. For multiple various clinical conditions, specific COS have been developed <sup>9</sup>. In  
81 cases where immune modulation is studied in a specific clinical condition, then outcomes from both the

1  
2  
3 82 COS for the clinical condition of investigation and immune modulation need to be collected, and most  
4  
5 83 likely there will be overlap of core outcomes.  
6  
7

8 84 **Aim:** The aim of this study is to develop a core outcome set (COS) for studies of immune modulation in  
9  
10 85 pregnancy. We will obtain this COS through consensus in a group of relevant experts using a Delphi  
11  
12 86 procedure with the outcomes generated by a systematic review as input.  
13  
14  
15  
16  
17  
18  
19  
20  
21  
22  
23  
24  
25  
26  
27  
28  
29  
30  
31  
32  
33  
34  
35  
36  
37  
38  
39  
40  
41  
42  
43  
44  
45  
46  
47  
48  
49  
50  
51  
52  
53  
54  
55  
56  
57  
58  
59  
60



## 87 **Methods and analysis**

### 88 **Overview**

89 To develop a core outcome set (COS) for studies of immune modulation in pregnancy (COSIMPREG) we  
90 will use a step-wise approach<sup>10</sup>:

- 91 1. Perform a systematic review to identify reported outcomes for immune modulation already  
92 in use
- 93 2. Use a Delphi procedure to develop a preliminary COS with input from the systematic review  
94 and experts
- 95 3. Organise a consensus meeting to discuss and finalize the COSIMPREG
- 96 4. Disseminate, and promote application of the final COSIMPREG

97  
98 This study will be conducted from December 2017 onwards, and we aim to have the COS finalised in  
99 March 2019. This study is registered at the Comet Initiative: [http://www.comet-](http://www.comet-initiative.org/studies/details/1004?result=true)  
100 [initiative.org/studies/details/1004?result=true](http://www.comet-initiative.org/studies/details/1004?result=true).

#### 102 **1. Perform a systematic review to identify reported outcomes for immune modulation already in use.**

103 The aim of the systematic review is to identify all outcomes that have been used in studies reporting on  
104 immune modulation in pregnancy. The review will be conducted according to PRISMA guidelines<sup>11</sup> and  
105 published separately. Within this review we will include all studies, human as well as animal,  
106 investigating immune modulation to improve pregnancy outcomes either as therapy or prevention. A  
107 comprehensive search will be conducted using the databases of PubMed, Embase, and Cochrane Central

1  
2  
3 108 Register of Controlled Trials. We will use the following search terms: (immune modulation OR synonyms)  
4  
5 109 AND (adverse pregnancy outcome OR synonym) AND (therapy OR prevention). We will use free text  
6  
7 110 words and index terms (MeSH for Pubmed, and Emtree for Embase). We aim to start this review in  
8  
9 111 January 2017. If the selection process takes longer than 6 months, we will update the search. No  
10  
11 112 language or date restriction will be applied.  
12  
13  
14

15 113 In order to identify all reported outcomes, we will not restrict data collection to RCTs only. We aim to  
16  
17 114 include: a) randomized clinical trials, open label clinical trials, and cohort studies reporting on b) immune  
18  
19 115 therapy or interventions targeting the immune response, in c) pregnant human or animal subjects  
20  
21 116 studying d) the preventive or therapeutic effect on (adverse) reproductive outcome.  
22  
23  
24

25 117 Studies will not be included, when they do not meet the criteria, for example: a) reported pregnancy  
26  
27 118 outcome as secondary outcome; b) case-reports, reviews, and expert opinions.  
28  
29

30 119 Two reviewers (JRP and FH) will independently screen titles and abstracts of all citations in order to  
31  
32 120 exclude all overtly irrelevant papers. One of the members of the review team (FH) is not involved in  
33  
34 121 obstetric research, and will therefore be unaware of authors and journals credentials. Consensus on  
35  
36 122 inclusion is reached when: a) both reviewers included a study, b) based on discussion in case of  
37  
38 123 difference opinions, or c) after consultation of the third reviewer (SJG) in case of persistent  
39  
40 124 disagreement. Of potentially relevant papers full text will be retrieved and studied in detail, to  
41  
42 125 determine whether the inclusion criteria are met. In case of disagreement, consensus between the  
43  
44 126 reviewers will be reached upon discussion, and if necessary through consultation of a third reviewer  
45  
46 127 (SJG). To search for additional studies, reference lists of all included studies and of relevant reviews will  
47  
48 128 be checked, conference abstracts will be screened, and published protocols without published follow-up  
49  
50 129 data will be identified. If necessary, authors will be contacted.  
51  
52  
53  
54  
55  
56  
57  
58  
59  
60

1  
2  
3 130 Two authors (JRP and FH) will independently extract data from the included studies. Data will be  
4  
5 131 extracted on the year of study, study design, study size, study population, human / animal study,  
6  
7 132 disclosures, and reported outcome. The reported outcomes in the included studies will first be  
8  
9  
10 133 summarized into four categories, namely: maternal clinical outcomes, fetal clinical outcomes, maternal  
11  
12 134 immune outcomes, and fetal immune outcomes. Furthermore, the above categories will be displayed  
13  
14 135 for both preventive and therapeutic immune modulation therapies. The study outcome will have no  
15  
16 136 influence on the extraction of the reported outcomes. For each reported outcome the number of times  
17  
18 137 it is reported in studies will be shown. This scoring will also be done in the four categories mentioned  
19  
20  
21 138 earlier. Data will be collected, entered in a predefined fact sheet, and analysed using Microsoft Excel.  
22  
23

24 139 Since we aim to include all outcomes reported to date and we do not focus on study outcome, included  
25  
26 140 studies will not be assessed regarding their risk of bias. However, information on funding sources of  
27  
28 141 individual studies (disclosure, see above) will be collected.  
29  
30

31 142 The protocol for the systematic review is currently under review at Prospero. The review will be started  
32  
33 143 early 2018. JRP will be the guarantor of this review. JRP and FH are responsible for selection of studies  
34  
35 144 for inclusion and for data-extraction. SJG will be consulted in case of disagreement. For the study there  
36  
37  
38 145 are no sources of financial support.  
39  
40

41 146 The findings of this systematic review will serve two purposes. First, in order to disseminate the results,  
42  
43 147 it will be published in an open access peer reviewed journal according to PRISMA (Preferred Reporting  
44  
45 148 Items for Systematic Reviews and Meta-analyses) guidelines<sup>11</sup>. Second, these results will be used for the  
46  
47  
48 149 Delphi procedure in order to develop a COS for studies focussing on immune modulation in pregnancy.  
49  
50

51 150  
52  
53  
54  
55  
56  
57  
58  
59  
60

1  
2  
3 151 **2. Use a Delphi procedure to develop a preliminary COS with input from the systematic review and**  
4  
5 152 **experts.**  
6  
7

8 153 To develop a preliminary COS for immune modulation studies in pregnancy we will use Delphi  
9  
10 154 methodology. In general, the aim of the Delphi method is to obtain consensus upon a subject and to  
11  
12 155 develop new knowledge, for example a COS<sup>7 12</sup>. Within a Delphi process structured statements are  
13  
14 156 scored by experts on relevance, then these statements are returned to the experts with scores at  
15  
16 157 individual and discipline group level, and this process is repeated until consensus is reached. It has been  
17  
18 158 reported that a Delphi procedure in general has an average of three rounds<sup>12</sup>. As we do not aim to  
19  
20 159 reach final consensus through the Delphi procedure, but instead through a consensus meeting, our  
21  
22 160 Delphi procedure is anticipated to consist of three rounds. Thereafter the not excluded outcomes will be  
23  
24 161 taken into the consensus meeting.  
25  
26  
27  
28

29 162 In the Delphi procedure we will include several groups of experts from different disciplines (panels)  
30  
31 163 based on professional background, together with patients. To be included within the professional expert  
32  
33 164 panel, experts should have worked at least 5 years within their expert field, and / or should have recent  
34  
35 165 relevant publications related to immune modulation in pregnancy, or have a well-known status in a  
36  
37 166 relevant field, and should have adequate English language skills. Experts having a professional  
38  
39 167 background as obstetrician, paediatrician, immunologist, reproductive scientist, or midwife will be  
40  
41 168 included in the expert panels. As the use of medication during pregnancy is dependent on the  
42  
43 169 motivation and understanding of pregnant women, we will also include healthy pregnant women within  
44  
45 170 our panels, and women who have experienced adverse outcomes that might reasonably have been  
46  
47 171 qualified for prevention or treatment with immunomodulation (lay experts). Women with a history of  
48  
49 172 recurrent miscarriage, and women with a history of preterm birth, fetal growth restriction and  
50  
51 173 preeclampsia, all complications of pregnancy for which immune modulation is considered as promising  
52  
53  
54  
55  
56  
57  
58  
59  
60

1  
2  
3 174 will be considered as eligible. To be included within the patient subpanel, women should have adequate  
4  
5 175 English language skills.  
6  
7

8 176 Possible participants will be invited to participate in the Delphi procedure by email in which we will  
9  
10 177 explain the background and goals of the study. Patients will be included through patient organisations  
11  
12 178 (as for example the Dutch preeclampsia / help foundation) and invitational posters at the participating  
13  
14 179 centers.  
15  
16  
17

18 180 In the explanatory email we will use written text supported by a video explaining the need for a set of  
19  
20 181 core outcomes in reproductive immunology. We will also provide information on the time schedule for  
21  
22 182 every Delphi round. This email will also contain a link to accept the invitation, to provide informed  
23  
24 183 consent, and to register in the DelphiManager software system. We will furthermore ask the nominated  
25  
26 184 experts to provide us with the names of any other relevant experts who meet the inclusion criteria, and  
27  
28 185 should be invited to participate in order for this procedure to be optimally executed. We will ask all  
29  
30 186 participants to not personally contact any other potential experts, and to not discuss the Delphi  
31  
32 187 procedure. Furthermore, during the rest of the Delphi procedure all answers will be semi-anonymised,  
33  
34 188 participants are aware of their fellow panel members but not of their individual responses. Results  
35  
36 189 returned will include individual expert responses as well as responses on panel group level. We aim to  
37  
38 190 include at least 10 experts per subpanel to ensure optimal representation of all relevant disciplines and  
39  
40 191 to minimize attrition.  
41  
42  
43  
44  
45

46 192 We will use an anticipated 3 round Delphi procedure to reach consensus about the potential list of core  
47  
48 193 outcomes. The aim of the Delphi procedure is to eliminate all outcomes that are not fundamental or  
49  
50 194 essential. Experts can only be part of a next round if they have completed the former one. In each round  
51  
52 195 the participants will receive an email with a summary of the response rates and results so far and a link  
53  
54  
55  
56  
57  
58  
59  
60

1  
2  
3 196 to the next questionnaire. Each round will take approximately 3 weeks. Reminders will be send to the  
4  
5 197 respondents who have not yet responded, and 2 days before the deadline a final reminder will be send.  
6  
7

8  
9 198

10  
11 199 *First Delphi round*  
12  
13

14 200 In the first round a first voting of the relevance of possible outcomes, derived from the systematic  
15  
16 201 review, will be made on a Likert-scale. Panel members will be asked to score the importance of  
17  
18 202 outcomes on a Likert-scale, following the COMET advice<sup>10</sup>. Panel members will be scoring on a 9-point  
19  
20 203 Likert scale (see below). The items that have a median of at least 7 when a Likert of 9 is used. To ensure  
21  
22 204 a complete set of outcomes using the input of topic experts and (recently) pregnant women,  
23  
24 205 participants will be asked to add any outcome they miss within the list of outcomes and which they  
25  
26 206 consider as a core outcome.  
27  
28  
29  
30

31 207 *Second round*  
32  
33

34 208 In the second round the response rates for each panel and the total response rate will be reported. All  
35  
36 209 outcomes from round one will be presented again for weighting the importance, and in addition all  
37  
38 210 outcomes suggested by at least two participants. For each outcome the scoring of round one will be  
39  
40 211 presented at three levels: a) at the participants' individual level; b) at the level of the subpanel the  
41  
42 212 expert is participating in; and c) at the level of the other expert panels. These results will be presented  
43  
44 213 graphically in the form of a histogram (as generated by Delphimanager). Panel members own individual  
45  
46 214 responses can then be compared against the score of their respective subpanel, and against the score of  
47  
48 215 other subpanels. Participants will be asked to rate the importance of all outcomes again, but now with  
49  
50 216 the knowledge of the scores in round one. We will again underline in the explanatory text the aim of the  
51  
52 217 study, namely to identify fundamental / essential outcomes to be reported as a minimum set in each  
53  
54  
55  
56  
57  
58  
59  
60

1  
2  
3 218 study. Therefore, we will underline the importance to not be excessively inclusive, in order that a  
4  
5 219 manageable COS is delivered. We will emphasise that for every future reproductive immunology study  
6  
7 220 this will be a minimum outcome set, and that other outcomes relevant to individual studies can be  
8  
9 221 added. Furthermore, in this round we poll the panel members for availability to join the consensus  
10  
11 222 meeting as a satellite meeting of another event, probably Society of Reproductive Investigation (SRI)  
12  
13  
14 223 2019.

15  
16  
17 224 *Third round*

18  
19  
20 225 In round three outcomes will not be taken forward from the previous round if more than 70% of the  
21  
22 226 total panel judged the outcome as not important (score 1-3 on 9-point Likert scale) AND less than 15%  
23  
24 227 of experts regard this same outcome as important (score  $\geq 7$  on 9-point Likert scale). All the other  
25  
26 228 outcomes will be presented in round three.

27  
28  
29  
30 229 A preliminary list of outcomes for the consensus meeting will be assembled. To that end, the outcomes  
31  
32 230 retained after round two will be presented to the participants. The outcomes will be presented in similar  
33  
34 231 way as in round two.

35  
36  
37  
38 232 After the third round all outcomes having a score  $\geq 7$  on the 9-point Likert scale in at least 70% of the  
39  
40 233 participants will be taken forward into the consensus meeting as potential COS. Outcomes with more  
41  
42 234 than 70% of the participants judged as less important (score 1-3 on 9-point Likert scale) and less than 15%  
43  
44 235 as important (score  $\geq 7$  on 9-point Likert scale) will be excluded. Furthermore, the outcomes not  
45  
46 236 regarded as essential for the core outcome set and also not excluded will be presented at the consensus  
47  
48 237 meeting for further consensus voting.

49  
50  
51  
52 238

53  
54  
55 239 **3. Organise a consensus meeting to discuss and finalize the COS for immune modulation in pregnancy.**

1  
2  
3 240 To finalize the COS for immune modulation in pregnancy, we will organize a consensus meeting as a  
4  
5 241 satellite event to an international conference, presumably the SRI 2019 (March 2019). The Delphi  
6  
7 242 process is expected to take 12 months with final outcomes in early 2019. Within this consensus meeting,  
8  
9 243 we aim to have members of each stakeholder group present in person. A full day meeting, with an open  
10  
11 244 and collaborative character is proposed with an objective facilitator who will actively encourage equal  
12  
13 245 input of all participants and will prevent effect of strong voice or dominance by using nominal group  
14  
15 246 techniques. All outcomes still present after round three (of either Likert, so added) will be presented at  
16  
17 247 the consensus meeting.  
18  
19  
20  
21  
22 248

#### 25 249 **4. To implement the COS for immune modulation in pregnancy.**

26  
27  
28 250 After the COS for immune modulation in pregnancy is finalised, application in studies reporting on  
29  
30 251 immune modulation in pregnancy is stimulated by publication of the COS in an open access peer  
31  
32 252 reviewed reproductive immunology journal. Further, dissemination will also be through presentations at  
33  
34 253 appropriate international meetings, through relevant research and scientific societies, and through  
35  
36 254 relevant journals.  
37  
38  
39  
40  
41  
42  
43  
44  
45  
46  
47  
48  
49  
50  
51  
52  
53  
54  
55  
56  
57  
58  
59  
60



## 255 **Ethics and dissemination**

256 For this study ethics approval is not required. Participants will be asked to provide informed consent. For  
257 the dissemination of the COS we will use different strategies. We will disseminate all possible outcome  
258 measures as a systematic review, and publish this in a peer reviewed reproductive immunology or  
259 methodology journal. After we have finalised the COS for immune modulation in pregnancy, we will  
260 disseminate it through different channels. First, we will publish the COS in a reproductive immunology  
261 journal. Second, we will disseminate the COS at appropriate international meetings, such as  
262 reproductive immunology and reproductive sciences meetings. We will furthermore discuss it with  
263 patient organisations on how to inform pregnant women. We will also disseminate the COS through  
264 research and scientific societies.

265 **References**

- 266 1. Munoz-Suano A, Hamilton AB, Betz AG. Gimme shelter: the immune system during pregnancy.  
267 *Immunol Rev* 2011;241(1):20-38.
- 268 2. Guerin LR, Prins JR, Robertson SA. Regulatory T-cells and immune tolerance in pregnancy: a new  
269 target for infertility treatment? *Hum Reprod Update* 2009;15(5):517-35.
- 270 3. Lash GE, Bulmer JN. Do uterine natural killer (uNK) cells contribute to female reproductive disorders?  
271 *J Reprod Immunol* 2011;88(2):156-64.
- 272 4. Nagamatsu T, Schust DJ. The immunomodulatory roles of macrophages at the maternal-fetal  
273 interface. *Reprod Sci* 2010;17(3):209-18.
- 274 5. Prins JR, Kieffer TE, Scherjon SA. Immunomodulators to treat recurrent miscarriage. *Eur J Obstet  
275 Gynecol Reprod Biol* 2014;181:334-7.
- 276 6. Rolnik DL, Wright D, Poon LC, O'Gorman N, Syngelaki A, de Paco Matallana C, et al. Aspirin versus  
277 Placebo in Pregnancies at High Risk for Preterm Preeclampsia. *N Engl J Med* 2017;377(7):613-  
278 622.
- 279 7. Kirkham JJ, Davis K, Altman DG, Blazeby JM, Clarke M, Tunis S, et al. Core Outcome Set-STANDards  
280 for Development: The COS-STAD recommendations. *PLoS Med* 2017;14(11):e1002447.
- 281 8. Kirkham JJ, Gorst S, Altman DG, Blazeby J, Clarke M, Devane D, et al. COS-STAR: a reporting  
282 guideline for studies developing core outcome sets (protocol). *Trials* 2015;16:373.
- 283 9. Duffy J, Rolph R, Gale C, Hirsch M, Khan KS, Ziebland S, et al. Core outcome sets in women's and  
284 newborn health: a systematic review. *Bjog* 2017;124(10):1481-1489.
- 285 10. Williamson PR, Altman DG, Bagley H, Barnes KL, Blazeby JM, Brookes ST, et al. The COMET  
286 Handbook: version 1.0. *Trials* 2017;18(Suppl 3):280.
- 287 11. Liberati A, Altman DG, Tetzlaff J, Mulrow C, Gotzsche PC, Ioannidis JP, et al. The PRISMA statement  
288 for reporting systematic reviews and meta-analyses of studies that evaluate health care  
289 interventions: explanation and elaboration. *PLoS Med* 2009;6(7):e1000100.
- 290 12. Diamond IR, Grant RC, Feldman BM, Pencharz PB, Ling SC, Moore AM, et al. Defining consensus: a  
291 systematic review recommends methodologic criteria for reporting of Delphi studies. *J Clin  
292 Epidemiol* 2014;67(4):401-9.

1  
2  
3 **295 Authors' contributions**  
4  
5

6  
7 296 J.R.P., S.J.G. and S.A.R initiated this study and designed the protocol. J.R.P., F.H., and S.J.G. wrote the  
8 297 first draft of this manuscript. All authors critically revised the protocol and the manuscript. J.R.P. and  
9 298 F.H. will be responsible for selection of studies for inclusion and for data-extraction for the systematic  
10 299 review. J.R.P., J.W.G., J.H., and S.J.G. will be responsible for the Delphi procedure. S.A.S and S.A.R. will  
11 300 select and invite the experts.  
12  
13  
14  
15  
16  
17  
18  
19  
20  
21  
22  
23  
24  
25  
26  
27  
28  
29  
30  
31  
32  
33  
34  
35  
36  
37  
38  
39  
40  
41  
42  
43  
44  
45  
46  
47  
48  
49  
50  
51  
52  
53  
54  
55  
56  
57  
58  
59  
60

1  
2  
3 301 **Funding statement**  
4  
5

6  
7 302 This research received no specific grant from any funding agency in the public, commercial or not-for-  
8  
9 303 profit sectors'.  
10  
11  
12  
13  
14  
15  
16  
17  
18  
19  
20  
21  
22  
23  
24  
25  
26  
27  
28  
29  
30  
31  
32  
33  
34  
35  
36  
37  
38  
39  
40  
41  
42  
43  
44  
45  
46  
47  
48  
49  
50  
51  
52  
53  
54  
55  
56  
57  
58  
59  
60

1  
2  
3  
4  
5  
6  
7  
8  
9  
10  
11  
12  
13  
14  
15  
16  
17  
18  
19  
20  
21  
22  
23  
24  
25  
26  
27  
28  
29  
30  
31  
32  
33  
34  
35  
36  
37  
38  
39  
40  
41  
42  
43  
44  
45  
46  
47  
48  
49  
50  
51  
52  
53  
54  
55  
56  
57  
58  
59  
60

304 **Competing interests statement**

305 The authors have no competing interests other than being involved in reproductive immunology  
306 research.

For peer review only

# BMJ Open

## Development of a Core Outcome Sets for IMmunomodulation in PREGnancy (COSIMPREG): a protocol for a systematic review and Delphi study

|                                 |                                                                                                                                                                                                                                                                                                                                                                                                                                                                                                                                                                                                                                                                                                                                                                                                                                                                                                                                                        |
|---------------------------------|--------------------------------------------------------------------------------------------------------------------------------------------------------------------------------------------------------------------------------------------------------------------------------------------------------------------------------------------------------------------------------------------------------------------------------------------------------------------------------------------------------------------------------------------------------------------------------------------------------------------------------------------------------------------------------------------------------------------------------------------------------------------------------------------------------------------------------------------------------------------------------------------------------------------------------------------------------|
| Journal:                        | <i>BMJ Open</i>                                                                                                                                                                                                                                                                                                                                                                                                                                                                                                                                                                                                                                                                                                                                                                                                                                                                                                                                        |
| Manuscript ID                   | bmjopen-2018-021619.R1                                                                                                                                                                                                                                                                                                                                                                                                                                                                                                                                                                                                                                                                                                                                                                                                                                                                                                                                 |
| Article Type:                   | Protocol                                                                                                                                                                                                                                                                                                                                                                                                                                                                                                                                                                                                                                                                                                                                                                                                                                                                                                                                               |
| Date Submitted by the Author:   | 09-Mar-2018                                                                                                                                                                                                                                                                                                                                                                                                                                                                                                                                                                                                                                                                                                                                                                                                                                                                                                                                            |
| Complete List of Authors:       | Prins, Jelmer; University of Groningen, University Medical Center Groningen, Department of Obstetrics and Gynaecology<br>Holvast, Floor; University of Groningen, University Medical Center Groningen, Department of General Practice<br>Van 't Hooft, Janneke; University of Amsterdam, Department of Obstetrics and Gynaecology, Academic Medical Center<br>Bos, Arend; University of Groningen, University Medical Center Groningen,, Division of Neonatology, Department of Pediatrics<br>Ganzevoort, Jan; Academic Medical Center, Amsterdam, Department of Obstetrics and Gynaecology<br>Scherjon, Sicco ; University of Groningen, University Medical Center Groningen, Department of Obstetrics and Gynaecology<br>Robertson, Sarah; University of Adelaide, Robinson Research Institute and Adelaide Medical School<br>Gordijn, Sanne; University of Groningen, University Medical Center Groningen, Department of Obstetrics and Gynaecology |
| <b>Primary Subject Heading</b>: | Obstetrics and gynaecology                                                                                                                                                                                                                                                                                                                                                                                                                                                                                                                                                                                                                                                                                                                                                                                                                                                                                                                             |
| Secondary Subject Heading:      | Immunology (including allergy), Paediatrics, Reproductive medicine                                                                                                                                                                                                                                                                                                                                                                                                                                                                                                                                                                                                                                                                                                                                                                                                                                                                                     |
| Keywords:                       | immune modulation, therapy, prevention, pregnancy, core outcome set, COS                                                                                                                                                                                                                                                                                                                                                                                                                                                                                                                                                                                                                                                                                                                                                                                                                                                                               |
|                                 |                                                                                                                                                                                                                                                                                                                                                                                                                                                                                                                                                                                                                                                                                                                                                                                                                                                                                                                                                        |

SCHOLARONE™  
Manuscripts

1  
2  
3 1 Development of a Core Outcome Sets for IMmunomodulation in PREGnancy  
4  
5  
6 2 (COSIMPREG): a protocol for a systematic review and Delphi study  
7  
8

9  
10 3 *Author names and affiliations:*

11  
12 4 Jelmer R. Prins<sup>a,f</sup>

13  
14 5 Email address: [j.r.prins@umcg.nl](mailto:j.r.prins@umcg.nl)

15  
16 6 Floor Holvast<sup>b</sup>

17  
18 7 Email address: [f.holvast@umcg.nl](mailto:f.holvast@umcg.nl)

19  
20 8 Janneke van 't Hooft<sup>c</sup>

21  
22 9 Email address: [j.vanthoof@gmail.com](mailto:j.vanthoof@gmail.com)

23  
24 10 Arend F. Bos<sup>d</sup>

25  
26 11 Email address: [a.f.bos@umcg.nl](mailto:a.f.bos@umcg.nl)

27  
28 12 Jan Willem Ganzevoort<sup>c</sup>

29  
30 13 Email address: [j.w.ganzevoort@amc.uva.nl](mailto:j.w.ganzevoort@amc.uva.nl)

31  
32 14 Sicco A. Scherjon<sup>a</sup>

33  
34 15 Email address: [s.a.scherjon@umcg.nl](mailto:s.a.scherjon@umcg.nl)

35  
36 16 Sarah. A. Robertson<sup>e</sup>

37  
38 17 Email address: [sarah.robertson@adelaide.edu.au](mailto:sarah.robertson@adelaide.edu.au)

39  
40 18 Sanne J. Gordijn<sup>a</sup>

41  
42 19 Email address: [s.j.gordijn@umcg.nl](mailto:s.j.gordijn@umcg.nl)

43  
44 20 <sup>a</sup> University of Groningen, University Medical Center Groningen, Department of Obstetrics and Gynaecology, PO Box 30001,  
45 21 9700 RB Groningen, The Netherlands

46  
47 22 <sup>b</sup> University of Groningen, University Medical Center Groningen, Department of General Practice. PO Box 30001, 9700 RB  
48 23 Groningen, The Netherlands

49  
50  
51 24 <sup>c</sup> University of Amsterdam, Department of Obstetrics and Gynaecology, Academic Medical Center, PO Box 22660, 1100 DD,  
52 25 Amsterdam, The Netherlands

53  
54 26 <sup>d</sup> University of Groningen, University Medical Center Groningen, Division of Neonatology, Department of Pediatrics, Beatrix  
55 27 Children's Hospital, PO Box 30001, 9700 RB Groningen, The Netherlands

1  
2  
3 28 <sup>e</sup> Robinson Research Institute and Adelaide Medical School, University of Adelaide, Adelaide, SA, Australia  
4

5 29 <sup>f</sup> CORRESPONDENCE TO: Jelmer Prins: [j.r.prins@umcg.nl](mailto:j.r.prins@umcg.nl)  
6  
7  
8  
9  
10  
11  
12  
13  
14  
15  
16  
17  
18  
19  
20  
21  
22  
23  
24  
25  
26  
27  
28  
29  
30  
31  
32  
33  
34  
35  
36  
37  
38  
39  
40  
41  
42  
43  
44  
45  
46  
47  
48  
49  
50  
51  
52  
53  
54  
55  
56  
57  
58  
59  
60



30

**Abstract**

**Introduction:** To establish pregnancy the maternal immune system must adapt to tolerate the semi-allogenic fetus. Less than optimal adaptation of the maternal immune system during (early) pregnancy is implicated in several complications of pregnancy. The development of effective immune modulation interventions as preventive or therapeutic strategies for pregnancy complications holds promise. Several studies sought to evaluate the safety and effectiveness of various approaches. However, a limitation is the high variability in clinical and immune outcomes that are reported. We therefore aim to develop a core outcome set for application to studies of immune modulation in pregnancy (COSIMPREG).

**Methods and analysis:** We will use a step-wise approach to develop a COS for immune modulation in pregnancy. First, we will perform a systematic review to identify reported outcomes. For this review PRISMA guidelines will be followed. Second, we will use the Delphi method to develop a preliminary COSIMPREG. In three rounds the outcomes of the systematic review will be scored. A panel comprising experts from relevant disciplines and diverse geographical locations will be assembled until a sufficient quality of the panel is reached. We will use predefined decision rules for outcomes. After each round outcomes, including scores, will be returned to the panel for further refinement. The outcomes not excluded after the third round will be taken to a consensus meeting. In this meeting experts from all relevant disciplines will discuss and finalize the COSIMPREG.

**Ethics and dissemination:** For this study ethical approval is not required. The systematic review will be published in an appropriate open access reproductive immunology journal. Once the COSIMPREG is finalised it will be published in an open access reproductive immunology journal, and disseminated at appropriate international meetings, as well as through relevant research and scientific societies. Experts involved in the Delphi study will be asked to give informed consent.

1  
2  
3  
4  
5  
6  
7  
8  
9  
10  
11  
12  
13  
14  
15  
16  
17  
18  
19  
20  
21  
22  
23  
24  
25  
26  
27  
28  
29  
30  
31  
32  
33  
34  
35  
36  
37  
38  
39  
40  
41  
42  
43  
44  
45  
46  
47  
48  
49  
50  
51  
52  
53  
54  
55  
56  
57  
58  
59  
60

53

54

**Key words: immune modulation, therapy, prevention, pregnancy, core outcome set, COS**

55

For peer review only

1  
2  
3 56 **Strengths and limitations of this study**  
4  
5  
6 57  
7  
8 58

- 9 58
- The Delphi procedure involves experts from all relevant stakeholder groups including patients.
  - The Delphi procedure allows unbiased contributions, and is anonymous.
  - The systematic review and input of topic experts will assemble and synthesise evidence from a broad, inclusive base.
  - This protocol covers a topic which holds enormous potential for future reproductive medicine.
  - The intention is to publish the results in open access journals to optimize dissemination.
- 10 59  
11 60  
12 60  
13 61  
14 62  
15 62  
16 63  
17  
18  
19  
20  
21  
22  
23  
24  
25  
26  
27  
28  
29  
30  
31  
32  
33  
34  
35  
36  
37  
38  
39  
40  
41  
42  
43  
44  
45  
46  
47  
48  
49  
50  
51  
52  
53  
54  
55  
56  
57  
58  
59  
60

64

## 65 Introduction

66 The maternal immune response is instrumental in pregnancy health <sup>1</sup>. Failure of the immune response  
67 to adapt and respond correctly to conception and embryo implantation is associated with, and likely  
68 plays a causal role in, many complications of pregnancy <sup>2</sup>. During early pregnancy the maternal immune  
69 system must adapt to tolerate the fetus and placenta, both of which express paternal (foreign) as well as  
70 maternal histocompatibility antigens. Maladaptation of the maternal immune system is associated with  
71 common complications of pregnancy including preterm birth, preeclampsia, fetal growth restriction, and  
72 recurrent miscarriages <sup>2-4</sup>. Various approaches to immune modulation have been used for several  
73 indications in attempts to improve pregnancy outcome <sup>5</sup>. These approaches include drugs which have  
74 effects on the immune system, but also on other pathways. For example, a commonly used therapy is  
75 acetylsalicylic acid (aspirin), which is widely used to prevent preeclampsia <sup>6</sup>. In other reproductive  
76 disorders, such as recurrent miscarriage, interventions including paternal leukocyte immunization,  
77 progesterone, and steroids have been used, mostly with no demonstrable benefit <sup>5</sup>. There is a  
78 reasonable prospect that given advances in other disease conditions such as oncology <sup>7</sup> and  
79 autoimmune disease <sup>8-9</sup>, more targeted and effective immune-modulating therapeutic options will  
80 emerge for reproduction medicine. Although several pre-clinical / animal studies show promising results  
81 <sup>10-13</sup>, these options must now be tailored to achieve targeted, safe immunotherapy both as prevention  
82 and therapy for pregnancy complications. Moreover, since a range of immune factors are implicated in  
83 pregnancy complications <sup>14</sup> selection of the right patients will be essential for the success of therapy <sup>5,15</sup>.

84 In the current literature, there is high variability in the reported clinical outcomes and immunologic  
85 parameters measured. This variability hampers proper comparison across studies and harmonisation of  
86 data sets. Therefore, the objective of this study is to develop a core outcome set (COS) for studies  
87 investigating immune modulation in pregnancy <sup>16,17</sup>. Although immunologic studies in pregnancy are

1  
2  
3 88 usually condition-based with associated condition-specific outcomes, the COS developed in the current  
4  
5 89 study will comprise the fundamental outcomes which are considered essential for reporting in all  
6  
7 90 reproductive immunology studies. Specific COS have now been developed for multiple clinical  
8  
9 91 conditions, with demonstrable benefit for advancing medical care <sup>18</sup>. In cases where immune  
10  
11 92 modulation is studied in a specific clinical condition, then both COS outcomes for the clinical condition  
12  
13  
14 93 and the immune modulation will be collected, and most likely there will be overlap of core outcomes  
15  
16 94 across conditions.

17  
18  
19 95 **Aim:** The aim of this study is to develop a core outcome set (COS) for studies of immune modulation in  
20  
21 96 pregnancy. We aim to develop COSs for studies both in humans and animals, that will be reported  
22  
23 97 separately. We will obtain these COSs by consensus amongst a group of relevant experts using a Delphi  
24  
25  
26 98 procedure, using a systematic review as the initial input.  
27  
28  
29  
30  
31  
32  
33  
34  
35  
36  
37  
38  
39  
40  
41  
42  
43  
44  
45  
46  
47  
48  
49  
50  
51  
52  
53  
54  
55  
56  
57  
58  
59  
60

99

## 100 **Methods and analysis**

### 101 **Overview**

102 To develop a COS for studies of immune modulation in pregnancy (COSIMPREG) a step-wise approach  
103 will be utilised <sup>19</sup>:

- 104 1. Perform a systematic review to identify reported outcomes for immune modulation already  
105 in use
- 106 2. Use a Delphi procedure to develop a preliminary COS with input from the systematic review  
107 and experts
- 108 3. Organize a consensus meeting to discuss and finalize the COSIMPREG
- 109 4. Disseminate, and promote application of the final COSIMPREG

110

111 This study commenced in December 2017, with an expected completion date of December 2019. The  
112 study is registered at the Comet Initiative: [http://www.comet-](http://www.comet-initiative.org/studies/details/1004?result=true)  
113 [initiative.org/studies/details/1004?result=true](http://www.comet-initiative.org/studies/details/1004?result=true).

### 114 **Patient and Public Involvement**

115 Patient and Public were not involved in the development of this protocol. However, they will be involved  
116 and included within the Delphi procedure as expert group. And they will participate in the consensus  
117 meeting.

118

1  
2  
3 **119 1. Perform a systematic review to identify reported outcomes for immune modulation already in use.**  
4  
5

6 120 The aim of the systematic review is to identify all outcomes that have been used to date in studies  
7  
8 121 reporting on immune modulation in pregnancy. A secondary aim of this review is to identify potential  
9  
10 122 experts for the Delphi panels. The review will be conducted according to PRISMA guidelines<sup>20</sup>, and will  
11  
12  
13 123 be published separately. The review will include all studies, human as well as animal, investigating  
14  
15 124 immune modulation either as therapy or prevention, with the goal of improving pregnancy outcome. A  
16  
17 125 comprehensive search will be conducted using the databases of PubMed, Embase, and Cochrane Central  
18  
19 126 Register of Controlled Trials. The search strategy will be different for human and animal studies. We will  
20  
21 127 use free text words and index terms (MeSH for Pubmed, and Emtree for Embase). See Table 1 for the  
22  
23 128 preliminary Medline search strategies for human and animal studies. We will perform the literature  
24  
25 129 search early March 2018. If the selection process extends beyond 6 months, the search will be updated  
26  
27  
28 130 to cover the interim period. No language or date restriction will be applied.

29  
30  
31 131 In order to identify all reported outcomes, we aim to include: a) randomized clinical trials, open label  
32  
33 132 clinical trials, and cohort studies reporting on b) immune therapy or other interventions targeting the  
34  
35 133 immune response, in c) pregnant human or animal subjects studying d) the preventive or therapeutic  
36  
37 134 effect on an adverse reproductive outcome.

38  
39  
40  
41 135 Studies will not be included when they do not meet the inclusion criteria, for example: a) pregnancy  
42  
43 136 outcome reported as secondary outcome; b) case-reports, reviews, and expert opinions.

44  
45  
46 137 Two reviewers (JRP and FH) will independently screen titles and abstracts of all citations in order to  
47  
48 138 exclude all overtly irrelevant papers. One of the members of the review team (FH) is not involved in  
49  
50 139 obstetric research, and will therefore be unaware of author and journal credentials. Consensus on  
51  
52 140 inclusion will be reached when: a) both reviewers include a study, b) agreement is reached after  
53  
54 141 discussion in the case of differing opinions, or c) a third reviewer (SJG) is consulted in the case of  
55  
56  
57  
58  
59  
60

142 persistent disagreement. For potentially relevant papers the full text will be retrieved and studied in  
 143 detail, to determine whether the inclusion criteria are met. In case of disagreement, consensus between  
 144 the reviewers will be reached upon discussion, and if necessary through consultation with a third  
 145 reviewer (SJG). To search for additional studies, reference lists of all included studies and relevant  
 146 reviews will be checked, conference abstracts will be screened, and published protocols without  
 147 published follow-up data will be identified. If necessary, authors will be contacted.

148 Table 1 Search strategy

|    |                                                                                                                                                                                                                                             |                    |
|----|---------------------------------------------------------------------------------------------------------------------------------------------------------------------------------------------------------------------------------------------|--------------------|
| #1 | pre-eclampsia*[tiab] OR preeclampsia*[tiab] OR miscarriage*[tiab] OR pregnancy loss*[tiab] OR abort*[tiab] OR pre-term[tiab] OR preterm[tiab] OR growth restrict*[tiab] OR pregnancy fail*[tiab] OR fetal loss* [tiab] OR infertile* [tiab] |                    |
| #2 | "immunoproteins"[Mesh] OR "cytokines"[Mesh] OR "immunology" [Subheading] OR immunomodulation[tiab] OR immune modulation[tiab] OR immunotherapy[tiab] OR "immunomodulation"[Mesh]                                                            |                    |
| #3 | randomized controlled trial [pt] OR controlled clinical trial [pt] OR randomized [tiab] OR placebo [tiab] OR drug therapy [sh] OR randomly [tiab] OR trial [tiab] OR groups [tiab]))                                                        |                    |
| #4 | animal*[tiab] OR mice[tiab] OR mouse[tiab] OR rat[tiab] OR rats[tiab] OR pig[tiab] OR pigs[tiab]OR sheep[tiab] OR goat*[tiab] OR lamb[tiab] OR lambs[tiab]                                                                                  |                    |
| #5 | improve*[Title] OR outcome*[Title] OR loss*[Title] OR treatment*[Title] OR decreas*[Title] OR failure*[Title] OR promot*[Title] OR impair*[Title] OR prevent*[Title] OR induc*[Title] OR restor*[Title] OR rebalanc*[Title]                 |                    |
| #6 | #1 AND #2 AND #3 NOT #4                                                                                                                                                                                                                     | Human studies      |
| #7 | #1 AND #2 AND #4 AND #5                                                                                                                                                                                                                     | Animal studies     |
| #8 | #6 OR #7                                                                                                                                                                                                                                    | Preliminary search |



1  
2  
3 149 Two authors (JRP and FH) will independently extract data from the included studies. Data will be  
4  
5 150 extracted on the year of study, study design, study size, study population, human / animal study,  
6  
7 151 reported outcome(s), and authors. The reported outcomes in the included studies will first be  
8  
9 152 summarized into human and animal studies, and thereafter into four categories, namely: maternal  
10  
11 153 clinical outcomes, fetal clinical outcomes, maternal immune parameters, and fetal immune parameters.  
12  
13  
14 154 Furthermore, the above categories will be displayed for both preventive and therapeutic immune  
15  
16 155 modulation interventions. The study outcome will have no influence on the extraction of the reported  
17  
18 156 outcomes and parameters. Overlapping outcomes will be collated and reported under a covering term.  
19  
20  
21 157 For each reported outcome the number of times it is reported (absolute and relative) in studies will be  
22  
23 158 shown. This scoring will also be done in the categories mentioned earlier. References will be organized  
24  
25 159 using RefWorks. Data will be collected, entered in a predefined fact sheet, and analysed using Microsoft  
26  
27 160 Excel.

28  
29  
30  
31 161 Since we aim to include all relevant outcomes and parameters reported to date and we will not  
32  
33 162 discriminate on efficacy of intervention, the included studies will not be assessed regarding their risk of  
34  
35 163 bias, nor will they be graded.

36  
37  
38 164 The protocol for the systematic review is not eligible for registration at Prospero as it has no direct  
39  
40 165 health-related outcomes. JRP will be the guarantor of this review. JRP and FH are responsible for  
41  
42 166 selection of studies for inclusion and for data-extraction. SJG will be consulted in case of disagreement.  
43  
44  
45 167 For the systematic review there are no sources of financial support.

46  
47  
48 168 The findings of this systematic review will serve three purposes. Firstly, in order to disseminate the  
49  
50 169 results, it will be published in an open access peer-reviewed journal according to PRISMA (Preferred  
51  
52 170 Reporting Items for Systematic Reviews and Meta-analyses) guidelines<sup>20</sup>. Secondly, the results will be  
53  
54  
55 171 used for the Delphi procedure in order to develop a COS for studies focusing on immune modulation in  
56  
57  
58  
59  
60

1  
2  
3 172 pregnancy. Third, the extracted data regarding authors will help to identify potential experts for the  
4  
5 173 Delphi procedure.  
6  
7

8 174  
9

10  
11 175 **2. Use a Delphi procedure to develop a preliminary COS with input from the systematic review and**  
12  
13  
14 176 **experts.**  
15

16  
17 177 To develop a preliminary COS for immune modulation studies in pregnancy we will use Delphi  
18  
19 178 methodology. In general, the aim of the Delphi method is to obtain consensus upon a subject and to  
20  
21 179 develop new knowledge, and this has been applied previously to COS development<sup>16,21</sup>. In the Delphi  
22  
23 180 process, structured statements are scored by experts on relevance, then these statements are returned  
24  
25 181 to the experts with scores at individual and discipline group level, and this process is repeated until  
26  
27 182 consensus is reached. On average, Delphi procedures are reported to require three iterative rounds<sup>21</sup>.  
28  
29 183 Since we plan to reach final consensus by adding a consensus meeting at the completion of the Delphi  
30  
31 184 procedure, three rounds of Delphi procedure are expected to be sufficient. All outcomes not excluded  
32  
33 185 through the three Delphi rounds will be taken into the consensus meeting for final approval.  
34  
35  
36

37  
38 186 For the Delphi procedure we will take an inclusive approach and cast a wide net to assemble several  
39  
40 187 panels comprising experts from different professional disciplines, together with a patient / consumer  
41  
42 188 group. To be included on a professional expert panel, members should have worked at least 5 years  
43  
44 189 within their field, and / or should have recent publications related to immune modulation in pregnancy,  
45  
46 190 or have a well-known status in a relevant field, and should have adequate English language skills.  
47  
48 191 Experts in obstetrics, paediatrics, laboratory-based and clinical immunology, reproduction science, and  
49  
50 192 midwifery will be included on the expert panels. To ensure that all panels have sufficient geographic  
51  
52 193 distribution and to prevent bias, experts will be identified and selected through a range of processes,  
53  
54 194 with a goal to include at least 100 relevant participants. Firstly, potential experts involved in immune  
55  
56  
57  
58  
59  
60

1  
2  
3 195 modulating studies will be identified through the systematic review. This will identify potential experts  
4  
5 196 with >5 years of work in this field, and with relevant recent publications. Secondly, we will ask potential  
6  
7 197 panel members to identify other experts, and to provide names of other relevant experts (see below).  
8  
9  
10 198 We will ask experts specifically to nominate potential experts in South America, Africa, and Asia-Oceania  
11  
12 199 as these are regions that have been under-represented in previous Delphi procedures with an obstetric  
13  
14 200 focus<sup>22 23</sup>.

15  
16  
17 201 Regarding the patient / consumer group selection the procedure is slightly different. We will invite  
18  
19 202 patient and consumer organizations from a range of countries as above to become involved and to  
20  
21 203 nominate appropriate individuals. To ensure geographical diversity in the Delphi procedure we will  
22  
23 204 include at least 10 experts on each panel (at least 10 pediatricians, at least 10 patients, and etcetera).

24  
25  
26  
27 205 As the use of medication or other interventions during pregnancy is dependent on the motivation and  
28  
29 206 understanding of pregnant women, panels will include both healthy pregnant women and women who  
30  
31 207 have experienced adverse outcomes that might reasonably have qualified for prevention or treatment  
32  
33 208 with immune modulation. Women with a history of recurrent miscarriage, preterm birth, fetal growth  
34  
35 209 restriction and/or preeclampsia, all complications of pregnancy for which immune modulation is  
36  
37 210 considered as holding promise, will be eligible. To be included within a patient/consumer subpanel,  
38  
39 211 women must have adequate English language skills.

40  
41  
42  
43 212 Candidate expert and lay participants will be invited to participate in the Delphi procedure by email in  
44  
45 213 which we will explain the background and goals of the study. Lay participants will be accessed through  
46  
47 214 patient and consumer organizations (for example the Dutch preeclampsia / Hellp foundation / March of  
48  
49 215 Dimes / Perinatal Society of Australia New Zealand) and invitational posters at participating centres  
50  
51 216 distributed around the world.  
52  
53  
54  
55  
56  
57  
58  
59  
60

1  
2  
3 217 In the explanatory email we will use written text supported by a video explaining the need for a set of  
4  
5 218 core outcomes in reproductive immunology, and information on the time commitment and schedule for  
6  
7 219 each Delphi round. The email will also contain a link to accept the invitation, to provide informed  
8  
9 220 consent, and to register in the software. Nominated experts will be invited to provide the names of  
10  
11 221 other relevant experts who meet the inclusion criteria, and reasonably should be invited to participate  
12  
13 222 to achieve optimal inclusion. Participants will be asked to not personally contact other potential experts,  
14  
15 223 and to not discuss the Delphi procedure, to ensure unbiased input. Responses to the Delphi procedure  
16  
17 224 will be semi-anonymised, such that participants are aware of their fellow panel members but not of  
18  
19 225 their individual responses. Results returned will include individual expert responses as well as responses  
20  
21 226 on a panel group level.

22  
23  
24  
25  
26 227 As not all different panels will include experts in animal studies, and since we aim to develop two  
27  
28 228 separate COS documents for animal and human studies, only the reproductive science and immunology  
29  
30 229 panels will be able to contribute to assembling the animal COS.

31  
32  
33  
34 230 We anticipate a three round Delphi procedure to reach consensus on the shortlist of core outcomes. The  
35  
36 231 aim of the Delphi procedure is to eliminate all outcomes that are not fundamental or essential. Experts  
37  
38 232 can only be part of a subsequent round if they complete the former one. In each round the participants  
39  
40 233 will receive an email with a summary of the response rates and results to date and a link to the next  
41  
42 234 questionnaire. Each round will take approximately 3 weeks. Reminders will be send to the respondents  
43  
44 235 who have not yet responded, and 2 days before the deadline a final reminder will be send.

#### 45 46 47 48 236 *First Delphi round*

49  
50  
51 237 In the first round an initial assessment of the relevance of possible outcomes, derived from the  
52  
53 238 systematic review, will be made. Panel members will be asked to score the importance of outcomes on a  
54  
55 239 9-point Likert-scale, following the COMET advice<sup>19</sup>. Items will be ranked and those with a median of at

1  
2  
3 240 least 7 when a Likert of 9 is used will progress to the next round. To ensure a complete set of outcomes  
4  
5 241 using the input of topic experts and patients / consumers, participants will be asked to 'rescue' any  
6  
7 242 outcome missed by the panel's ranked list of outcomes and which they consider as a core outcome.  
8  
9

10  
11 243 *Second round*  
12

13  
14 244 In the second round the response rate for each panel and the overall response rate will be reported. All  
15  
16 245 outcomes reaching the cut-off threshold from round one will be presented again plus outcomes put  
17  
18 246 forward for rescue by at least two participants. For each outcome the scoring of round one will be  
19  
20 247 presented at three levels: a) at the participants' individual level; b) at the level of the expert subpanel;  
21  
22 248 and c) at the level of the other expert panels. These results will be presented graphically in the form of a  
23  
24 249 histogram (as generated by Delphimanager). Panel members' own individual responses can then be  
25  
26 250 compared against the score of their respective subpanel, and against the score of other subpanels.  
27  
28 251 Participants will be asked to rate the importance of all outcomes again, but now with the knowledge of  
29  
30 252 the scores in round one. We will again underline in the explanatory text the aim of the study, namely to  
31  
32 253 identify fundamental / essential outcomes to be reported as a minimum set in each study. It will be  
33  
34 254 essential to not be excessively inclusive, in order that a manageable COS is delivered. We will emphasise  
35  
36 255 that for every future reproductive immunology study this will be a minimum outcome set, and that  
37  
38 256 additional outcomes relevant to individual studies can always be added. Furthermore, in this round we  
39  
40 257 poll the panel members for availability to join the consensus meeting as a satellite meeting of another  
41  
42 258 event (see below).  
43  
44  
45  
46  
47

48 259 *Third round*  
49

50  
51 260 In round three outcomes will not be taken forward from the previous round if more than 70% of the  
52  
53 261 total panel judged the outcome as not essential (score 1-3 on 9-point Likert scale) AND less than 15% of  
54  
55  
56  
57  
58  
59  
60

1  
2  
3 262 experts regard this same outcome as important (score  $\geq 7$  on 9-point Likert scale). All the other  
4  
5 263 outcomes will be presented in round three.  
6  
7

8 264 A preliminary list of outcomes for the consensus meeting will be assembled. To that end, the outcomes  
9  
10 265 retained after round two will be presented to the participants. The outcomes will be presented in similar  
11  
12  
13 266 way as in round two. The reproductive scientists and immunologists will also receive a preliminary list of  
14  
15 267 animal studies core outcomes.  
16  
17

18 268 After the third round all outcomes having a score  $\geq 7$  on the 9-point Likert scale in at least 70% of the  
19  
20 269 participants will be taken forward into the consensus meeting as potential COS. Outcomes with more  
21  
22 270 than 70% of the participants judged as less important (score 1-3 on 9-point Likert scale) and less than  
23  
24 271 15% as important (score  $\geq 7$  on 9-point Likert scale) will be excluded. Furthermore, the outcomes not  
25  
26 272 regarded as essential for the core outcome set and also not excluded will be presented at the consensus  
27  
28 273 meeting for further consensus voting.  
29  
30  
31

32 274  
33  
34

35 275 **3. Organise a consensus meeting to discuss and finalize the COS for immune modulation in pregnancy.**  
36  
37

38 276 To finalize the COS for immune modulation in pregnancy, we will organize a consensus meeting as a  
39  
40 277 satellite event to an international conference in 2019, most likely to one of the following meetings:  
41  
42 278 Society of Reproductive Investigation, annual meeting of American Society of Reproductive  
43  
44 279 Immunology, or International Society for Immunology of Reproduction. This consensus meeting will be  
45  
46 280 divided into a clinical consensus meeting (involving all experts in the human COS), and an animal  
47  
48 281 consensus meeting (involving the reproductive scientists and immunologists only). The Delphi process is  
49  
50 282 expected to take 12 months with final outcome disseminated in 2019. Within this consensus meeting,  
51  
52 283 we aim to have members of each stakeholder group present in person. A full day meeting, with an open  
53  
54  
55  
56  
57  
58  
59  
60

1  
2  
3 284 and collaborative character is proposed with an objective facilitator who will actively encourage equal  
4  
5 285 input of all participants and will prevent skewing by strong voices or dominance using nominal group  
6  
7 286 techniques. All outcomes still present after round three (of either Likert, so added by rescue) will be  
8  
9  
10 287 presented at the consensus meeting.  
11  
12

13 288

14  
15  
16 289 **4. To implement the COS for immune modulation in pregnancy.**  
17

18  
19 290 After the COS for immune modulation in pregnancy is finalised, their uptake and application in studies  
20  
21 291 reporting on immune modulation in pregnancy will be stimulated by publication of both the human and  
22  
23 292 animal COS in an open access, peer-reviewed reproductive immunology journal. Further, dissemination  
24  
25  
26 293 will also be through presentations at appropriate international meetings, through relevant research and  
27  
28 294 scientific societies, and through relevant journals and electronic media channels.  
29  
30  
31  
32  
33  
34  
35  
36  
37  
38  
39  
40  
41  
42  
43  
44  
45  
46  
47  
48  
49  
50  
51  
52  
53  
54  
55  
56  
57  
58  
59  
60

1  
2  
3 295  
4  
56 296 **Ethics and dissemination**  
7  
8  
9

10 297 For this study ethics approval is not required. Participants will be asked to provide informed consent. For  
11  
12 298 the dissemination of the COS we will use a range of different strategies to maximise awareness and  
13  
14 299 encourage uptake. We will disseminate all possible outcome measures as a systematic review, and  
15  
16 300 publish this in a peer-reviewed reproductive immunology or methodology journal. Then after finalising  
17  
18 301 the COS for immune modulation in pregnancy, we will disseminate it through different channels. First,  
19  
20 302 we will publish the COS in a peer-reviewed reproductive immunology journal. Second, we will  
21  
22 303 disseminate the COS at appropriate international meetings, such as reproductive immunology and  
23  
24 304 reproductive sciences meetings. We will furthermore discuss it with patient / consumer organisations  
25  
26 305 with an emphasis on relevance to pregnant women. We will also disseminate the COS through scientific  
27  
28 306 societies, and appropriate electronic media.  
29  
30  
31  
32  
33  
34  
35  
36  
37  
38  
39  
40  
41  
42  
43  
44  
45  
46  
47  
48  
49  
50  
51  
52  
53  
54  
55  
56  
57  
58  
59  
60



307 **References**

- 308 1. Munoz-Suano A, Hamilton AB, Betz AG. Gimme shelter: the immune system during pregnancy. *Immunol Rev* 2011;241(1):20-38.
- 309 2. Guerin LR, Prins JR, Robertson SA. Regulatory T-cells and immune tolerance in pregnancy: a new target for infertility treatment? *Hum Reprod Update* 2009;15(5):517-35.
- 310 3. Lash GE, Bulmer JN. Do uterine natural killer (uNK) cells contribute to female reproductive disorders? *J Reprod Immunol* 2011;88(2):156-64.
- 311 4. Nagamatsu T, Schust DJ. The immunomodulatory roles of macrophages at the maternal-fetal interface. *Reprod Sci* 2010;17(3):209-18.
- 312 5. Prins JR, Kieffer TE, Scherjon SA. Immunomodulators to treat recurrent miscarriage. *Eur J Obstet Gynecol Reprod Biol* 2014;181:334-7.
- 313 6. Rolnik DL, Wright D, Poon LC, O'Gorman N, Syngelaki A, de Paco Matallana C, et al. Aspirin versus Placebo in Pregnancies at High Risk for Preterm Preeclampsia. *N Engl J Med* 2017;377(7):613-622.
- 314 7. Couzin-Frankel J. Breakthrough of the year 2013. Cancer immunotherapy. *Science* 2013;342(6165):1432-3.
- 315 8. Deng Y, Wang Z, Chang C, Lu L, Lau CS, Lu Q. Th9 cells and IL-9 in autoimmune disorders: Pathogenesis and therapeutic potentials. *Hum Immunol* 2017;78(2):120-128.
- 316 9. Dorner T, Lipsky PE. B cells: depletion or functional modulation in rheumatic diseases. *Curr Opin Rheumatol* 2014;26(2):228-36.
- 317 10. Chin PY, Dorian CL, Hutchinson MR, Olson DM, Rice KC, Moldenhauer LM, et al. Novel Toll-like receptor-4 antagonist (+)-naloxone protects mice from inflammation-induced preterm birth. *Sci Rep* 2016;6:36112.
- 318 11. Wang F, Xiao M, Chen RJ, Lin XJ, Siddiq M, Liu L. Adoptive transfer of T regulatory cells inhibits lipopolysaccharide-induced inflammation in fetal brain tissue in a late-pregnancy preterm birth mouse model. *Cell Biol Int* 2017;41(2):155-162.
- 319 12. Ibrahim T, Przybyl L, Harmon AC, Amaral LM, Faulkner JL, Cornelius DC, et al. Proliferation of endogenous regulatory T cells improve the pathophysiology associated with placental ischaemia of pregnancy. *Am J Reprod Immunol* 2017;78(5).
- 320 13. Wang WJ, Liu FJ, Xin L, Hao CF, Bao HC, Qu QL, et al. Adoptive transfer of pregnancy-induced CD4+CD25+ regulatory T cells reverses the increase in abortion rate caused by interleukin 17 in the CBA/JxBALB/c mouse model. *Hum Reprod* 2014;29(5):946-52.
- 321 14. Ledee N, Prat-Ellenberg L, Chevrier L, Balet R, Simon C, Lenoble C, et al. Uterine immune profiling for increasing live birth rate: A one-to-one matched cohort study. *J Reprod Immunol* 2017;119:23-30.
- 322 15. Hviid MM, Macklon N. Immune modulation treatments-where is the evidence? *Fertil Steril* 2017;107(6):1284-1293.
- 323 16. Kirkham JJ, Davis K, Altman DG, Blazeby JM, Clarke M, Tunis S, et al. Core Outcome Set-STAndards for Development: The COS-STAD recommendations. *PLoS Med* 2017;14(11):e1002447.
- 324 17. Kirkham JJ, Gorst S, Altman DG, Blazeby J, Clarke M, Devane D, et al. COS-STAR: a reporting guideline for studies developing core outcome sets (protocol). *Trials* 2015;16:373.
- 325 18. Duffy J, Rolph R, Gale C, Hirsch M, Khan KS, Ziebland S, et al. Core outcome sets in women's and newborn health: a systematic review. *Bjog* 2017;124(10):1481-1489.
- 326 19. Williamson PR, Altman DG, Bagley H, Barnes KL, Blazeby JM, Brookes ST, et al. The COMET Handbook: version 1.0. *Trials* 2017;18(Suppl 3):280.

- 1  
2  
3 352 **20. Liberati A, Altman DG, Tetzlaff J, Mulrow C, Gotzsche PC, Ioannidis JP, et al. The PRISMA statement**  
4 353 **for reporting systematic reviews and meta-analyses of studies that evaluate health care**  
5 354 **interventions: explanation and elaboration. *PLoS Med* 2009;6(7):e1000100.**  
6 355 **21. Diamond IR, Grant RC, Feldman BM, Pencharz PB, Ling SC, Moore AM, et al. Defining consensus: a**  
7 356 **systematic review recommends methodologic criteria for reporting of Delphi studies. *J Clin***  
8 357 ***Epidemiol* 2014;67(4):401-9.**  
9 358 **22. Gordijn SJ, Beune IM, Thilaganathan B, Papageorghiou A, Baschat AA, Baker PN, et al. Consensus**  
10 359 **definition of fetal growth restriction: a Delphi procedure. *Ultrasound Obstet Gynecol***  
11 360 **2016;48(3):333-9.**  
12 361 **23. Khalil A, Beune I, Hecher K, Wynia K, Ganzevoort W, Reed K, et al. Consensus definition and**  
13 362 **essential reporting parameters of selective fetal growth restriction in twin pregnancy: a Delphi**  
14 363 **procedure. *Ultrasound Obstet Gynecol* 2018.**  
15 364  
16 365

1  
2  
3 3664 367 **Authors' contributions**5 368 J.R.P., S.J.G. and S.A.R initiated this study and designed the protocol. J.R.P., F.H., and S.J.G. wrote the  
6  
7  
8  
9 369 first draft of this manuscript. All authors critically revised the protocol and the manuscript. J.R.P. and  
10 370 F.H. will be responsible for selection of studies for inclusion and for data-extraction for the systematic  
11  
12 371 review. J.R.P., J.W.G., J.H., and S.J.G. will be responsible for the Delphi procedure. S.A.S, A.F.B., and  
13 372 S.A.R. will select and invite the experts.  
14

15 373

16  
17 37418  
19 375  
20  
21  
22  
23  
24  
25  
26  
27  
28  
29  
30  
31  
32  
33  
34  
35  
36  
37  
38  
39  
40  
41  
42  
43  
44  
45  
46  
47  
48  
49  
50  
51  
52  
53  
54  
55  
56  
57  
58  
59  
60

1  
2  
3 376 **Acknowledgements**  
4

5  
6 377 We would like to thank DG van Ittersum for her assistance with the search strategy.  
7  
8  
9  
10  
11  
12  
13  
14  
15  
16  
17  
18  
19  
20  
21  
22  
23  
24  
25  
26  
27  
28  
29  
30  
31  
32  
33  
34  
35  
36  
37  
38  
39  
40  
41  
42  
43  
44  
45  
46  
47  
48  
49  
50  
51  
52  
53  
54  
55  
56  
57  
58  
59  
60

1  
2  
3  
4  
5  
6  
7  
8  
9  
10  
11  
12  
13  
14  
15  
16  
17  
18  
19  
20  
21  
22  
23  
24  
25  
26  
27  
28  
29  
30  
31  
32  
33  
34  
35  
36  
37  
38  
39  
40  
41  
42  
43  
44  
45  
46  
47  
48  
49  
50  
51  
52  
53  
54  
55  
56  
57  
58  
59  
60

378 **Funding statement**

379 This research received no specific grant from any funding agency in the public, commercial or not-for-  
380 profit sectors'.

For peer review only

1  
2  
3 381 **Competing interests statement**  
4  
5

6  
7 382 The authors have no competing interests other than being involved in reproductive immunology  
8  
9 383 research.  
10  
11  
12  
13  
14  
15  
16  
17  
18  
19  
20  
21  
22  
23  
24  
25  
26  
27  
28  
29  
30  
31  
32  
33  
34  
35  
36  
37  
38  
39  
40  
41  
42  
43  
44  
45  
46  
47  
48  
49  
50  
51  
52  
53  
54  
55  
56  
57  
58  
59  
60

# BMJ Open

## Development of a Core Outcome Sets for IMmunomodulation in PREGnancy (COSIMPREG): a protocol for a systematic review and Delphi study

|                                 |                                                                                                                                                                                                                                                                                                                                                                                                                                                                                                                                                                                                                                                                                                                                                                                                                                                                                                                                                        |
|---------------------------------|--------------------------------------------------------------------------------------------------------------------------------------------------------------------------------------------------------------------------------------------------------------------------------------------------------------------------------------------------------------------------------------------------------------------------------------------------------------------------------------------------------------------------------------------------------------------------------------------------------------------------------------------------------------------------------------------------------------------------------------------------------------------------------------------------------------------------------------------------------------------------------------------------------------------------------------------------------|
| Journal:                        | <i>BMJ Open</i>                                                                                                                                                                                                                                                                                                                                                                                                                                                                                                                                                                                                                                                                                                                                                                                                                                                                                                                                        |
| Manuscript ID                   | bmjopen-2018-021619.R2                                                                                                                                                                                                                                                                                                                                                                                                                                                                                                                                                                                                                                                                                                                                                                                                                                                                                                                                 |
| Article Type:                   | Protocol                                                                                                                                                                                                                                                                                                                                                                                                                                                                                                                                                                                                                                                                                                                                                                                                                                                                                                                                               |
| Date Submitted by the Author:   | 13-Jun-2018                                                                                                                                                                                                                                                                                                                                                                                                                                                                                                                                                                                                                                                                                                                                                                                                                                                                                                                                            |
| Complete List of Authors:       | Prins, Jelmer; University of Groningen, University Medical Center Groningen, Department of Obstetrics and Gynaecology<br>Holvast, Floor; University of Groningen, University Medical Center Groningen, Department of General Practice<br>Van 't Hooft, Janneke; University of Amsterdam, Department of Obstetrics and Gynaecology, Academic Medical Center<br>Bos, Arend; University of Groningen, University Medical Center Groningen,, Division of Neonatology, Department of Pediatrics<br>Ganzevoort, Jan; Academic Medical Center, Amsterdam, Department of Obstetrics and Gynaecology<br>Scherjon, Sicco ; University of Groningen, University Medical Center Groningen, Department of Obstetrics and Gynaecology<br>Robertson, Sarah; University of Adelaide, Robinson Research Institute and Adelaide Medical School<br>Gordijn, Sanne; University of Groningen, University Medical Center Groningen, Department of Obstetrics and Gynaecology |
| <b>Primary Subject Heading</b>: | Obstetrics and gynaecology                                                                                                                                                                                                                                                                                                                                                                                                                                                                                                                                                                                                                                                                                                                                                                                                                                                                                                                             |
| Secondary Subject Heading:      | Immunology (including allergy), Paediatrics, Reproductive medicine                                                                                                                                                                                                                                                                                                                                                                                                                                                                                                                                                                                                                                                                                                                                                                                                                                                                                     |
| Keywords:                       | immune modulation, therapy, prevention, pregnancy, core outcome set, COS                                                                                                                                                                                                                                                                                                                                                                                                                                                                                                                                                                                                                                                                                                                                                                                                                                                                               |
|                                 |                                                                                                                                                                                                                                                                                                                                                                                                                                                                                                                                                                                                                                                                                                                                                                                                                                                                                                                                                        |

SCHOLARONE™  
Manuscripts

1  
2  
3 1 Development of a Core Outcome Sets for IMmunomodulation in PREGnancy  
4  
5  
6 2 (COSIMPREG): a protocol for a systematic review and Delphi study  
7  
8

9  
10 3 *Author names and affiliations:*

11  
12 4 Jelmer R. Prins<sup>a,f</sup>

13  
14 5 Email address: [j.r.prins@umcg.nl](mailto:j.r.prins@umcg.nl)

15  
16 6 Floor Holvast<sup>b</sup>

17  
18 7 Email address: [f.holvast@umcg.nl](mailto:f.holvast@umcg.nl)

19  
20 8 Janneke van 't Hooft<sup>c</sup>

21  
22 9 Email address: [j.vanthoof@gmail.com](mailto:j.vanthoof@gmail.com)

23  
24 10 Arend F. Bos<sup>d</sup>

25  
26 11 Email address: [a.f.bos@umcg.nl](mailto:a.f.bos@umcg.nl)

27  
28 12 Jan Willem Ganzevoort<sup>c</sup>

29  
30 13 Email address: [j.w.ganzevoort@amc.uva.nl](mailto:j.w.ganzevoort@amc.uva.nl)

31  
32 14 Sicco A. Scherjon<sup>a</sup>

33  
34 15 Email address: [s.a.scherjon@umcg.nl](mailto:s.a.scherjon@umcg.nl)

35  
36 16 Sarah. A. Robertson<sup>e</sup>

37  
38 17 Email address: [sarah.robertson@adelaide.edu.au](mailto:sarah.robertson@adelaide.edu.au)

39  
40 18 Sanne J. Gordijn<sup>a</sup>

41  
42 19 Email address: [s.j.gordijn@umcg.nl](mailto:s.j.gordijn@umcg.nl)

43  
44 20 <sup>a</sup> University of Groningen, University Medical Center Groningen, Department of Obstetrics and Gynaecology, PO Box 30001,  
45 21 9700 RB Groningen, The Netherlands

46  
47 22 <sup>b</sup> University of Groningen, University Medical Center Groningen, Department of General Practice. PO Box 30001, 9700 RB  
48 23 Groningen, The Netherlands

49  
50  
51 24 <sup>c</sup> University of Amsterdam, Department of Obstetrics and Gynaecology, Academic Medical Center, PO Box 22660, 1100 DD,  
52 25 Amsterdam, The Netherlands

53  
54 26 <sup>d</sup> University of Groningen, University Medical Center Groningen, Division of Neonatology, Department of Pediatrics, Beatrix  
55 27 Children's Hospital, PO Box 30001, 9700 RB Groningen, The Netherlands



1  
2  
3 28 <sup>e</sup> Robinson Research Institute and Adelaide Medical School, University of Adelaide, Adelaide, SA, Australia  
4

5 29 <sup>f</sup> CORRESPONDENCE TO: Jelmer Prins: [j.r.prins@umcg.nl](mailto:j.r.prins@umcg.nl)  
6  
7

8 30  
9  
10  
11  
12  
13  
14  
15  
16  
17  
18  
19  
20  
21  
22  
23  
24  
25  
26  
27  
28  
29  
30  
31  
32  
33  
34  
35  
36  
37  
38  
39  
40  
41  
42  
43  
44  
45  
46  
47  
48  
49  
50  
51  
52  
53  
54  
55  
56  
57  
58  
59  
60

For peer review only

## 31 Abstract

32 **Introduction:** To establish pregnancy the maternal immune system must adapt to tolerate the semi-  
33 allogenic fetus. Less than optimal adaptation of the maternal immune system during (early) pregnancy is  
34 implicated in several complications of pregnancy. The development of effective immune modulation  
35 interventions as preventive or therapeutic strategies for pregnancy complications holds promise. Several  
36 studies sought to evaluate the safety and effectiveness of various approaches. However, a limitation is  
37 the high variability in clinical and immune outcomes that are reported. We therefore aim to develop a  
38 core outcome set for application to studies of immune modulation in pregnancy (COSIMPREG).

39 **Methods and analysis:** We will use a step-wise approach to develop a COS for immune modulation in  
40 pregnancy. First, we will perform a systematic review to identify reported outcomes. For this review  
41 PRISMA guidelines will be followed. Second, we will use the Delphi method to develop a preliminary  
42 COSIMPREG. In three rounds the outcomes of the systematic review will be scored. A panel comprising  
43 experts from relevant disciplines and diverse geographical locations will be assembled until a sufficient  
44 quality of the panel is reached. We will use predefined decision rules for outcomes. After each round  
45 outcomes, including scores, will be returned to the panel for further refinement. The outcomes not  
46 excluded after the third round will be taken to a consensus meeting. In this meeting experts from all  
47 relevant disciplines will discuss and finalize the COSIMPREG.

48 **Ethics and dissemination:** For this study ethical approval is not required. The systematic review will be  
49 published in an appropriate open access reproductive immunology journal. Once the COSIMPREG is  
50 finalised it will be published in an open access reproductive immunology journal, and disseminated at  
51 appropriate international meetings, as well as through relevant research and scientific societies. Experts  
52 involved in the Delphi study will be asked to give informed consent.

53

1  
2  
3 54 **Key words: immune modulation, therapy, prevention, pregnancy, core outcome set, COS**  
4  
5  
6 55  
7  
8  
9  
10  
11  
12  
13  
14  
15  
16  
17  
18  
19  
20  
21  
22  
23  
24  
25  
26  
27  
28  
29  
30  
31  
32  
33  
34  
35  
36  
37  
38  
39  
40  
41  
42  
43  
44  
45  
46  
47  
48  
49  
50  
51  
52  
53  
54  
55  
56  
57  
58  
59  
60

1  
2  
3 56 **Strengths and limitations of this study**  
4  
5  
6 57  
7  
8 58

- 9 58
- The Delphi procedure involves experts from all relevant stakeholder groups including patients.
  - The Delphi procedure allows unbiased contributions, and is anonymous.
  - The systematic review and input of topic experts will assemble and synthesise evidence from a broad, inclusive base.
  - This protocol covers a topic which holds enormous potential for future reproductive medicine.
  - The intention is to publish the results in open access journals to optimize dissemination.
- 10 59  
11 60  
12 60  
13 61  
14 62  
15 62  
16 63  
17  
18  
19  
20  
21  
22  
23  
24  
25  
26  
27  
28  
29  
30  
31  
32  
33  
34  
35  
36  
37  
38  
39  
40  
41  
42  
43  
44  
45  
46  
47  
48  
49  
50  
51  
52  
53  
54  
55  
56  
57  
58  
59  
60

## 64 Introduction

65 The maternal immune response is instrumental in pregnancy health <sup>1</sup>. Failure of the immune response  
66 to adapt and respond correctly to conception and embryo implantation is associated with, and likely  
67 plays a causal role in, many complications of pregnancy <sup>2</sup>. During early pregnancy the maternal immune  
68 system must adapt to tolerate the fetus and placenta, both of which express paternal (foreign) as well as  
69 maternal histocompatibility antigens. Maladaptation of the maternal immune system is associated with  
70 common complications of pregnancy including preterm birth, preeclampsia, fetal growth restriction, and  
71 recurrent miscarriages <sup>2-4</sup>. Various approaches to immune modulation have been used for several  
72 indications in attempts to improve pregnancy outcome <sup>5</sup>. These approaches include drugs which have  
73 effects on the immune system, but also on other pathways. For example, a commonly used therapy is  
74 acetylsalicylic acid (aspirin), which is widely used to prevent preeclampsia <sup>6</sup>. In other reproductive  
75 disorders, such as recurrent miscarriage, interventions including paternal leukocyte immunization,  
76 progesterone, and steroids have been used, mostly with no demonstrable benefit <sup>5</sup>. This could be  
77 explained by the fact that reproductive disorders, such as recurrent miscarriage, have a multifactorial  
78 pathogenesis, and that developing a successful immune modulator depends on selecting appropriate  
79 patient groups.

80 There is a reasonable prospect that given advances in other disease conditions such as oncology <sup>7</sup> and  
81 autoimmune disease <sup>8 9</sup>, more targeted and effective immune-modulating therapeutic options will  
82 emerge for reproduction medicine. Although several pre-clinical / animal studies show promising results  
83 <sup>10-13</sup>, these options must now be tailored to achieve targeted, safe immunotherapy both as prevention  
84 and therapy for pregnancy complications. Moreover, since a range of factors including non-immune  
85 related, are implicated in pregnancy complications <sup>14</sup> selection of the right patients will be essential for  
86 the success of therapy <sup>5 15</sup>.

1  
2  
3 87 In the current literature, there is high variability in the reported clinical outcomes and immunologic  
4  
5 88 parameters measured <sup>15</sup>. This variability hampers proper comparison across studies and harmonisation  
6  
7  
8 89 of data sets. Therefore, the objective of this study is to develop a core outcome set (COS) for studies  
9  
10 90 investigating immune modulation in pregnancy <sup>16 17</sup>. Although immunologic studies in pregnancy are  
11  
12 91 usually condition-based with associated condition-specific outcomes, the COS developed in the current  
13  
14 92 study will comprise the fundamental outcomes which are considered essential for reporting in all  
15  
16 93 reproductive immunology studies. Specific COS have now been developed for multiple clinical  
17  
18 94 conditions, with demonstrable benefit for advancing medical care <sup>18</sup>. In cases where immune  
19  
20 95 modulation is studied in a specific clinical condition, then both COS outcomes for the clinical condition  
21  
22 96 and the immune modulation will be collected, and most likely there will be overlap of core outcomes  
23  
24  
25 97 across conditions.  
26  
27

28  
29 98 **Aim:** The aim of this study is to develop a core outcome set (COS) for studies of immune modulation in  
30  
31 99 pregnancy. We aim to develop COSs for studies both in humans and animals, that will be reported  
32  
33 100 separately. We will obtain these COSs by consensus amongst a group of relevant experts using a Delphi  
34  
35 101 procedure, using a systematic review as the initial input.  
36  
37

38 102  
39  
40  
41  
42  
43  
44  
45  
46  
47  
48  
49  
50  
51  
52  
53  
54  
55  
56  
57  
58  
59  
60

## 103 **Methods and analysis**

### 104 **Overview**

105 To develop a COS for studies of immune modulation in pregnancy (COSIMPREG) a step-wise approach  
106 will be utilised <sup>19</sup>:

- 107 1. Perform a systematic review to identify reported outcomes for immune modulation already  
108 in use
- 109 2. Use a Delphi procedure to develop a preliminary COS with input from the systematic review  
110 and experts
- 111 3. Organize a consensus meeting to discuss and finalize the COSIMPREG
- 112 4. Disseminate, and promote application of the final COSIMPREG

113  
114 This study commenced in December 2017, with an expected completion date of December 2019. The  
115 study is registered at the Comet Initiative: [http://www.comet-](http://www.comet-initiative.org/studies/details/1004?result=true)  
116 [initiative.org/studies/details/1004?result=true](http://www.comet-initiative.org/studies/details/1004?result=true).

### 118 **Patient and Public Involvement**

119 Patient and Public were not involved in the development of this protocol. However, they will be involved  
120 and included within the Delphi procedure as expert group. And they will participate in the consensus  
121 meeting.

122

1  
2  
3 123 **1. Perform a systematic review to identify reported outcomes for immune modulation already in use.**  
4  
5

6 124 The aim of the systematic review is to identify all outcomes that have been used to date in studies  
7  
8 125 reporting on immune modulation in pregnancy. A secondary aim of this review is to identify potential  
9  
10 126 experts for the Delphi panels. The review will be conducted according to PRISMA guidelines<sup>20</sup>, and will  
11  
12  
13 127 be published separately. The review will include all studies, human as well as animal, investigating  
14  
15 128 immune modulation either as therapy or prevention, with the goal of improving pregnancy outcome. A  
16  
17 129 comprehensive search will be conducted using the databases of PubMed, Embase, and Cochrane Central  
18  
19 130 Register of Controlled Trials. The search strategy will be different for human and animal studies. We will  
20  
21 131 use free text words and index terms (MeSH for Pubmed, and Emtree for Embase). See Table 1 for the  
22  
23 132 preliminary Medline search strategies for human and animal studies. We will perform the literature  
24  
25 133 search early March 2018. If the selection process extends beyond 6 months, the search will be updated  
26  
27 134 to cover the interim period. No language or date restriction will be applied.  
28  
29  
30

31 135 In order to identify all reported outcomes, we aim to include: a) randomized clinical trials, open label  
32  
33 136 clinical trials, and cohort studies reporting on b) immune therapy or other interventions targeting the  
34  
35 137 immune response, in c) pregnant human or animal subjects studying d) the preventive or therapeutic  
36  
37 138 effect on an adverse reproductive outcome.  
38  
39  
40

41 139 Studies will not be included when they do not meet the inclusion criteria, for example: a) pregnancy  
42  
43 140 outcome reported as secondary outcome; b) case-reports, reviews, and expert opinions.  
44  
45

46 141 Two reviewers (JRP and FH) will independently screen titles and abstracts of all citations in order to  
47  
48 142 exclude all overtly irrelevant papers. One of the members of the review team (FH) is not involved in  
49  
50 143 obstetric research, and will therefore be unaware of author and journal credentials. Consensus on  
51  
52 144 inclusion will be reached when: a) both reviewers include a study, b) agreement is reached after  
53  
54 145 discussion in the case of differing opinions, or c) a third reviewer (SJG) is consulted in the case of  
55  
56  
57  
58  
59  
60



146 persistent disagreement. For potentially relevant papers the full text will be retrieved and studied in  
 147 detail, to determine whether the inclusion criteria are met. In case of disagreement, consensus between  
 148 the reviewers will be reached upon discussion, and if necessary through consultation with a third  
 149 reviewer (SJG). To search for additional studies, reference lists of all included studies and relevant  
 150 reviews will be checked, conference abstracts will be screened, and published protocols without  
 151 published follow-up data will be identified. If necessary, authors will be contacted.

152 Table 1 Search strategy

|    |                                                                                                                                                                                                                                             |                    |
|----|---------------------------------------------------------------------------------------------------------------------------------------------------------------------------------------------------------------------------------------------|--------------------|
| #1 | pre-eclampsia*[tiab] OR preeclampsia*[tiab] OR miscarriage*[tiab] OR pregnancy loss*[tiab] OR abort*[tiab] OR pre-term[tiab] OR preterm[tiab] OR growth restrict*[tiab] OR pregnancy fail*[tiab] OR fetal loss* [tiab] OR infertile* [tiab] |                    |
| #2 | "immunoproteins"[Mesh] OR "cytokines"[Mesh] OR "immunology" [Subheading] OR immunomodulation[tiab] OR immune modulation[tiab] OR immunotherapy[tiab] OR "immunomodulation"[Mesh]                                                            |                    |
| #3 | randomized controlled trial [pt] OR controlled clinical trial [pt] OR randomized [tiab] OR placebo [tiab] OR drug therapy [sh] OR randomly [tiab] OR trial [tiab] OR groups [tiab]))                                                        |                    |
| #4 | animal*[tiab] OR mice[tiab] OR mouse[tiab] OR rat[tiab] OR rats[tiab] OR pig[tiab] OR pigs[tiab]OR sheep[tiab] OR goat*[tiab] OR lamb[tiab] OR lambs[tiab]                                                                                  |                    |
| #5 | improve*[Title] OR outcome*[Title] OR loss*[Title] OR treatment*[Title] OR decreas*[Title] OR failure*[Title] OR promot*[Title] OR impair*[Title] OR prevent*[Title] OR induc*[Title] OR restor*[Title] OR rebalanc*[Title]                 |                    |
| #6 | #1 AND #2 AND #3 NOT #4                                                                                                                                                                                                                     | Human studies      |
| #7 | #1 AND #2 AND #4 AND #5                                                                                                                                                                                                                     | Animal studies     |
| #8 | #6 OR #7                                                                                                                                                                                                                                    | Preliminary search |

1  
2  
3 153 Two authors (JRP and FH) will independently extract data from the included studies. Data will be  
4  
5 154 extracted on the year of study, study design, study size, study population, human / animal study,  
6  
7 155 reported outcome(s), and authors. The reported outcomes in the included studies will first be  
8  
9  
10 156 summarized into human and animal studies, and thereafter into four categories, namely: maternal  
11  
12 157 clinical outcomes, fetal clinical outcomes, maternal immune parameters, and fetal immune parameters.  
13  
14 158 Furthermore, the above categories will be displayed for both preventive and therapeutic immune  
15  
16 159 modulation interventions. The study outcome will have no influence on the extraction of the reported  
17  
18  
19 160 outcomes and parameters. Overlapping outcomes will be collated and reported under a covering term.  
20  
21 161 For each reported outcome the number of times it is reported (absolute and relative) in studies will be  
22  
23 162 shown. This scoring will also be done in the categories mentioned earlier. References will be organized  
24  
25 163 using RefWorks. Data will be collected, entered in a predefined fact sheet, and analysed using Microsoft  
26  
27  
28 164 Excel.

29  
30  
31 165 Since we aim to include all relevant outcomes and parameters reported to date and we will not  
32  
33 166 discriminate on efficacy of intervention, the included studies will not be assessed regarding their risk of  
34  
35 167 bias, nor will they be graded.

36  
37  
38 168 The protocol for the systematic review is not eligible for registration at Prospero as it has no direct  
39  
40 169 health-related outcomes. JRP will be the guarantor of this review. JRP and FH are responsible for  
41  
42  
43 170 selection of studies for inclusion and for data-extraction. SJG will be consulted in case of disagreement.  
44  
45 171 For the systematic review there are no sources of financial support.

46  
47  
48 172 The findings of this systematic review will serve three purposes. Firstly, in order to disseminate the  
49  
50 173 results, it will be published in an open access peer-reviewed journal according to PRISMA (Preferred  
51  
52 174 Reporting Items for Systematic Reviews and Meta-analyses) guidelines<sup>20</sup>. Secondly, the results will be  
53  
54  
55 175 used for the Delphi procedure in order to develop a COS for studies focusing on immune modulation in  
56  
57  
58  
59  
60

1  
2  
3 176 pregnancy. Third, the extracted data regarding authors will help to identify potential experts for the  
4  
5 177 Delphi procedure.  
6  
7

8  
9 178

10  
11 179 **2. Use a Delphi procedure to develop a preliminary COS with input from the systematic review and**  
12  
13  
14 180 **experts.**  
15

16  
17 181 To develop a preliminary COS for immune modulation studies in pregnancy we will use Delphi  
18  
19 182 methodology. In general, the aim of the Delphi method is to obtain consensus upon a subject and to  
20  
21 183 develop new knowledge, and this has been applied previously to COS development<sup>16,21</sup>. In the Delphi  
22  
23 184 process, structured statements are scored by experts on relevance, then these statements are returned  
24  
25 185 to the experts with scores at individual and discipline group level, and this process is repeated until  
26  
27 186 consensus is reached. On average, Delphi procedures are reported to require three iterative rounds<sup>21</sup>.  
28  
29 187 Since we plan to reach final consensus by adding a consensus meeting at the completion of the Delphi  
30  
31 188 procedure, three rounds of Delphi procedure are expected to be sufficient. All outcomes not excluded  
32  
33 189 through the three Delphi rounds will be taken into the consensus meeting for final approval.  
34  
35  
36

37  
38 190 For the Delphi procedure we will take an inclusive approach and cast a wide net to assemble several  
39  
40 191 panels comprising experts from different professional disciplines, together with a patient / consumer  
41  
42 192 group. To be included on a professional expert panel, members should have worked at least 5 years  
43  
44 193 within their field, and / or should have recent publications related to immune modulation in pregnancy,  
45  
46 194 or have a well-known status in a relevant field, and should have adequate English language skills.  
47  
48 195 Experts in obstetrics, paediatrics, laboratory-based and clinical immunology, reproduction science, and  
49  
50 196 midwifery will be included on the expert panels. To ensure that all panels have sufficient geographic  
51  
52 197 distribution and to prevent bias, experts will be identified and selected through a range of processes,  
53  
54 198 with a goal to include at least 100 relevant participants. Firstly, potential experts involved in immune  
55  
56  
57  
58  
59  
60

1  
2  
3 199 modulating studies will be identified through the systematic review. This will identify potential experts  
4  
5 200 with >5 years of work in this field, and with relevant recent publications. Secondly, we will ask potential  
6  
7 201 panel members to identify other experts, and to provide names of other relevant experts (see below).  
8  
9  
10 202 We will ask experts specifically to nominate potential experts in South America, Africa, and Asia-Oceania  
11  
12 203 as these are regions that have been under-represented in previous Delphi procedures with an obstetric  
13  
14 204 focus<sup>22 23</sup>.

15  
16  
17 205 Regarding the patient / consumer group selection the procedure is slightly different. We will invite  
18  
19 206 patient and consumer organizations from a range of countries as above to become involved and to  
20  
21 207 nominate appropriate individuals. To ensure geographical diversity in the Delphi procedure we will  
22  
23 208 include at least 10 experts on each panel (at least 10 pediatricians, at least 10 patients, and etcetera).

24  
25  
26  
27 209 As the use of medication or other interventions during pregnancy is dependent on the motivation and  
28  
29 210 understanding of pregnant women, panels will include both healthy pregnant women and women who  
30  
31 211 have experienced adverse outcomes that might reasonably have qualified for prevention or treatment  
32  
33 212 with immune modulation. Women with a history of recurrent miscarriage, preterm birth, fetal growth  
34  
35 213 restriction and/or preeclampsia, all complications of pregnancy for which immune modulation is  
36  
37 214 considered as holding promise, will be eligible. To be included within a patient/consumer subpanel,  
38  
39 215 women must have adequate English language skills.

40  
41  
42  
43 216 Candidate expert and lay participants will be invited to participate in the Delphi procedure by email in  
44  
45 217 which we will explain the background and goals of the study. Lay participants will be accessed through  
46  
47 218 patient and consumer organizations (for example the Dutch preeclampsia / Hellp foundation / March of  
48  
49 219 Dimes / Perinatal Society of Australia New Zealand) and invitational posters at participating centres  
50  
51 220 distributed around the world.  
52  
53  
54  
55  
56  
57  
58  
59  
60

1  
2  
3 221 In the explanatory email we will use written text supported by a video explaining the need for a set of  
4  
5 222 core outcomes in reproductive immunology, and information on the time commitment and schedule for  
6  
7 223 each Delphi round. The email will also contain a link to accept the invitation, to provide informed  
8  
9 224 consent, and to register in the software. Nominated experts will be invited to provide the names of  
10  
11 225 other relevant experts who meet the inclusion criteria, and reasonably should be invited to participate  
12  
13 226 to achieve optimal inclusion. Participants will be asked to not personally contact other potential experts,  
14  
15 227 and to not discuss the Delphi procedure, to ensure unbiased input. Responses to the Delphi procedure  
16  
17 228 will be semi-anonymised, such that participants are aware of their fellow panel members but not of  
18  
19 229 their individual responses. Results returned will include individual expert responses as well as responses  
20  
21 230 on a panel group level.  
22  
23  
24  
25

26 231 As not all different panels will include experts in animal studies, and since we aim to develop two  
27  
28 232 separate COS documents for animal and human studies, only the reproductive science and immunology  
29  
30 233 panels will be able to contribute to assembling the animal COS.  
31  
32  
33

34 234 We anticipate a three round Delphi procedure to reach consensus on the shortlist of core outcomes. The  
35  
36 235 aim of the Delphi procedure is to eliminate all outcomes that are not fundamental or essential. Experts  
37  
38 236 can only be part of a subsequent round if they complete the former one. In each round the participants  
39  
40 237 will receive an email with a summary of the response rates and results to date and a link to the next  
41  
42 238 questionnaire. Each round will take approximately 3 weeks. Reminders will be send to the respondents  
43  
44 239 who have not yet responded, and 2 days before the deadline a final reminder will be send.  
45  
46  
47

#### 48 240 *First Delphi round*

49  
50

51 241 In the first round an initial assessment of the relevance of possible outcomes, derived from the  
52  
53 242 systematic review, will be made. Panel members will be asked to score the importance of outcomes on a  
54  
55 243 9-point Likert-scale, following the COMET advice<sup>19</sup>. Items will be ranked and those with a median of at  
56  
57  
58  
59  
60

1  
2  
3 244 least 7 when a Likert of 9 is used will progress to the next round. To ensure a complete set of outcomes  
4  
5 245 using the input of topic experts and patients / consumers, participants will be asked to 'rescue' any  
6  
7 246 outcome missed by the panel's ranked list of outcomes and which they consider as a core outcome.  
8  
9

10  
11 247 *Second round*  
12

13  
14 248 In the second round the response rate for each panel and the overall response rate will be reported. All  
15  
16 249 outcomes reaching the cut-off threshold from round one will be presented again plus outcomes put  
17  
18 250 forward for rescue by at least two participants. For each outcome the scoring of round one will be  
19  
20 251 presented at three levels: a) at the participants' individual level; b) at the level of the expert subpanel;  
21  
22 252 and c) at the level of the other expert panels. These results will be presented graphically in the form of a  
23  
24 253 histogram (as generated by Delphimanager). Panel members' own individual responses can then be  
25  
26 254 compared against the score of their respective subpanel, and against the score of other subpanels.  
27  
28 255 Participants will be asked to rate the importance of all outcomes again, but now with the knowledge of  
29  
30 256 the scores in round one. We will again underline in the explanatory text the aim of the study, namely to  
31  
32 257 identify fundamental / essential outcomes to be reported as a minimum set in each study. It will be  
33  
34 258 essential to not be excessively inclusive, in order that a manageable COS is delivered. We will emphasise  
35  
36 259 that for every future reproductive immunology study this will be a minimum outcome set, and that  
37  
38 260 additional outcomes relevant to individual studies can always be added. Furthermore, in this round we  
39  
40 261 poll the panel members for availability to join the consensus meeting as a satellite meeting of another  
41  
42 262 event (see below).  
43  
44  
45  
46  
47

48 263 *Third round*  
49

50  
51 264 In round three outcomes will not be taken forward from the previous round if more than 70% of the  
52  
53 265 total panel judged the outcome as not essential (score 1-3 on 9-point Likert scale) AND less than 15% of  
54  
55  
56  
57  
58  
59  
60

1  
2  
3 266 experts regard this same outcome as important (score  $\geq 7$  on 9-point Likert scale). All the other  
4  
5 267 outcomes will be presented in round three.  
6  
7

8 268 A preliminary list of outcomes for the consensus meeting will be assembled. To that end, the outcomes  
9  
10 269 retained after round two will be presented to the participants. The outcomes will be presented in similar  
11  
12  
13 270 way as in round two. The reproductive scientists and immunologists will also receive a preliminary list of  
14  
15 271 animal studies core outcomes.  
16  
17

18 272 After the third round all outcomes having a score  $\geq 7$  on the 9-point Likert scale in at least 70% of the  
19  
20 273 participants will be taken forward into the consensus meeting as potential COS. Outcomes with more  
21  
22 274 than 70% of the participants judged as less important (score 1-3 on 9-point Likert scale) and less than  
23  
24 275 15% as important (score  $\geq 7$  on 9-point Likert scale) will be excluded. Furthermore, the outcomes not  
25  
26 276 regarded as essential for the core outcome set and also not excluded will be presented at the consensus  
27  
28 277 meeting for further consensus voting.  
29  
30  
31

32 278  
33  
34

35  
36 279 **3. Organise a consensus meeting to discuss and finalize the COS for immune modulation in pregnancy.**  
37

38  
39 280 To finalize the COS for immune modulation in pregnancy, we will organize a consensus meeting as a  
40  
41 281 satellite event to an international conference in 2019, most likely to one of the following meetings:  
42  
43 282 Society of Reproductive Investigation, annual meeting of American Society of Reproductive  
44  
45 283 Immunology, or International Society for Immunology of Reproduction. This consensus meeting will be  
46  
47 284 divided into a clinical consensus meeting (involving all experts in the human COS), and an animal  
48  
49 285 consensus meeting (involving the reproductive scientists and immunologists only). The Delphi process is  
50  
51 286 expected to take 12 months with final outcome disseminated in 2019. Within this consensus meeting,  
52  
53  
54 287 we aim to have members of each stakeholder group present in person. A full day meeting, with an open  
55  
56  
57  
58  
59  
60

1  
2  
3 288 and collaborative character is proposed with an objective facilitator who will actively encourage equal  
4  
5 289 input of all participants and will prevent skewing by strong voices or dominance using nominal group  
6  
7 290 techniques. All outcomes still present after round three (of either Likert, so added by rescue) will be  
8  
9  
10 291 presented at the consensus meeting.  
11  
12

13 292  
14  
15

16 293 **4. To implement the COS for immune modulation in pregnancy.**  
17  
18

19 294 After the COS for immune modulation in pregnancy is finalised, their uptake and application in studies  
20  
21 295 reporting on immune modulation in pregnancy will be stimulated by publication of both the human and  
22  
23 296 animal COS in an open access, peer-reviewed reproductive immunology journal. Further, dissemination  
24  
25  
26 297 will also be through presentations at appropriate international meetings, through relevant research and  
27  
28 298 scientific societies, and through relevant journals and electronic media channels.  
29  
30  
31  
32  
33  
34  
35  
36  
37  
38  
39  
40  
41  
42  
43  
44  
45  
46  
47  
48  
49  
50  
51  
52  
53  
54  
55  
56  
57  
58  
59  
60



## 299 **Ethics and dissemination**

300 For this study ethics approval is not required. Participants will be asked to provide informed consent. For  
301 the dissemination of the COS we will use a range of different strategies to maximise awareness and  
302 encourage uptake. We will disseminate all possible outcome measures as a systematic review, and  
303 publish this in a peer-reviewed reproductive immunology or methodology journal. Then after finalising  
304 the COS for immune modulation in pregnancy, we will disseminate it through different channels. First,  
305 we will publish the COS in a peer-reviewed reproductive immunology journal. Second, we will  
306 disseminate the COS at appropriate international meetings, such as reproductive immunology and  
307 reproductive sciences meetings. We will furthermore discuss it with patient / consumer organisations  
308 with an emphasis on relevance to pregnant women. We will also disseminate the COS through scientific  
309 societies, and appropriate electronic media.

310 **References**

- 311 1. Munoz-Suano A, Hamilton AB, Betz AG. Gimme shelter: the immune system during pregnancy.  
312 *Immunol Rev* 2011;241(1):20-38.
- 313 2. Guerin LR, Prins JR, Robertson SA. Regulatory T-cells and immune tolerance in pregnancy: a new  
314 target for infertility treatment? *Hum Reprod Update* 2009;15(5):517-35.
- 315 3. Lash GE, Bulmer JN. Do uterine natural killer (uNK) cells contribute to female reproductive  
316 disorders? *J Reprod Immunol* 2011;88(2):156-64.
- 317 4. Nagamatsu T, Schust DJ. The immunomodulatory roles of macrophages at the maternal-fetal  
318 interface. *Reprod Sci* 2010;17(3):209-18.
- 319 5. Prins JR, Kieffer TE, Scherjon SA. Immunomodulators to treat recurrent miscarriage. *Eur J Obstet*  
320 *Gynecol Reprod Biol* 2014;181:334-7.
- 321 6. Rolnik DL, Wright D, Poon LC, O'Gorman N, Syngelaki A, de Paco Matallana C, et al. Aspirin versus  
322 Placebo in Pregnancies at High Risk for Preterm Preeclampsia. *N Engl J Med* 2017;377(7):613-  
323 622.
- 324 7. Couzin-Frankel J. Breakthrough of the year 2013. Cancer immunotherapy. *Science*  
325 2013;342(6165):1432-3.
- 326 8. Deng Y, Wang Z, Chang C, Lu L, Lau CS, Lu Q. Th9 cells and IL-9 in autoimmune disorders:  
327 Pathogenesis and therapeutic potentials. *Hum Immunol* 2017;78(2):120-128.
- 328 9. Dorner T, Lipsky PE. B cells: depletion or functional modulation in rheumatic diseases. *Curr Opin*  
329 *Rheumatol* 2014;26(2):228-36.
- 330 10. Chin PY, Dorian CL, Hutchinson MR, Olson DM, Rice KC, Moldenhauer LM, et al. Novel Toll-like  
331 receptor-4 antagonist (+)-naloxone protects mice from inflammation-induced preterm birth.  
332 *Sci Rep* 2016;6:36112.
- 333 11. Wang F, Xiao M, Chen RJ, Lin XJ, Siddiq M, Liu L. Adoptive transfer of T regulatory cells inhibits  
334 lipopolysaccharide-induced inflammation in fetal brain tissue in a late-pregnancy preterm  
335 birth mouse model. *Cell Biol Int* 2017;41(2):155-162.
- 336 12. Ibrahim T, Przybyl L, Harmon AC, Amaral LM, Faulkner JL, Cornelius DC, et al. Proliferation of  
337 endogenous regulatory T cells improve the pathophysiology associated with placental  
338 ischaemia of pregnancy. *Am J Reprod Immunol* 2017;78(5).
- 339 13. Wang WJ, Liu FJ, Xin L, Hao CF, Bao HC, Qu QL, et al. Adoptive transfer of pregnancy-induced  
340 CD4+CD25+ regulatory T cells reverses the increase in abortion rate caused by interleukin 17 in  
341 the CBA/JxBALB/c mouse model. *Hum Reprod* 2014;29(5):946-52.
- 342 14. Ledee N, Prat-Ellenberg L, Chevrier L, Balet R, Simon C, Lenoble C, et al. Uterine immune profiling  
343 for increasing live birth rate: A one-to-one matched cohort study. *J Reprod Immunol*  
344 2017;119:23-30.
- 345 15. Hviid MM, Macklon N. Immune modulation treatments-where is the evidence? *Fertil Steril*  
346 2017;107(6):1284-1293.
- 347 16. Kirkham JJ, Davis K, Altman DG, Blazeby JM, Clarke M, Tunis S, et al. Core Outcome Set-STAndards  
348 for Development: The COS-STAD recommendations. *PLoS Med* 2017;14(11):e1002447.
- 349 17. Kirkham JJ, Gorst S, Altman DG, Blazeby J, Clarke M, Devane D, et al. COS-STAR: a reporting  
350 guideline for studies developing core outcome sets (protocol). *Trials* 2015;16:373.
- 351 18. Duffy J, Rolph R, Gale C, Hirsch M, Khan KS, Ziebland S, et al. Core outcome sets in women's and  
352 newborn health: a systematic review. *Bjog* 2017;124(10):1481-1489.
- 353 19. Williamson PR, Altman DG, Bagley H, Barnes KL, Blazeby JM, Brookes ST, et al. The COMET  
354 Handbook: version 1.0. *Trials* 2017;18(Suppl 3):280.

- 1  
2  
3 355 20. Liberati A, Altman DG, Tetzlaff J, Mulrow C, Gotzsche PC, Ioannidis JP, et al. The PRISMA statement  
4 356 for reporting systematic reviews and meta-analyses of studies that evaluate health care  
5 357 interventions: explanation and elaboration. *PLoS Med* 2009;6(7):e1000100.  
6 358 21. Diamond IR, Grant RC, Feldman BM, Pencharz PB, Ling SC, Moore AM, et al. Defining consensus: a  
7 359 systematic review recommends methodologic criteria for reporting of Delphi studies. *J Clin*  
8 360 *Epidemiol* 2014;67(4):401-9.  
9 361 22. Gordijn SJ, Beune IM, Thilaganathan B, Papageorghiou A, Baschat AA, Baker PN, et al. Consensus  
10 362 definition of fetal growth restriction: a Delphi procedure. *Ultrasound Obstet Gynecol*  
11 363 2016;48(3):333-9.  
12 364 23. Khalil A, Beune I, Hecher K, Wynia K, Ganzevoort W, Reed K, et al. Consensus definition and  
13 365 essential reporting parameters of selective fetal growth restriction in twin pregnancy: a Delphi  
14 366 procedure. *Ultrasound Obstet Gynecol* 2018.  
15 367  
16 368  
17  
18  
19  
20  
21  
22  
23  
24  
25  
26  
27  
28  
29  
30  
31  
32  
33  
34  
35  
36  
37  
38  
39  
40  
41  
42  
43  
44  
45  
46  
47  
48  
49  
50  
51  
52  
53  
54  
55  
56  
57  
58  
59  
60

1  
2  
3 **369 Authors' contributions**

4 370 J.R.P., S.J.G. and S.A.R initiated this study and designed the protocol. J.R.P., F.H., and S.J.G. wrote the  
5  
6 371 first draft of this manuscript. All authors critically revised the protocol and the manuscript. J.R.P. and  
7  
8 372 F.H. will be responsible for selection of studies for inclusion and for data-extraction for the systematic  
9  
10 373 review. J.R.P., J.W.G., J.H., and S.J.G. will be responsible for the Delphi procedure. S.A.S, A.F.B., and  
11  
12 374 S.A.R. will select and invite the experts.  
13  
14 375  
15  
16 376  
17  
18  
19  
20  
21  
22  
23  
24  
25  
26  
27  
28  
29  
30  
31  
32  
33  
34  
35  
36  
37  
38  
39  
40  
41  
42  
43  
44  
45  
46  
47  
48  
49  
50  
51  
52  
53  
54  
55  
56  
57  
58  
59  
60

For peer review only

1  
2  
3 378 **Acknowledgements**  
4

5  
6 379 We would like to thank DG van Ittersum for her assistance with the search strategy.  
7  
8  
9  
10  
11  
12  
13  
14  
15  
16  
17  
18  
19  
20  
21  
22  
23  
24  
25  
26  
27  
28  
29  
30  
31  
32  
33  
34  
35  
36  
37  
38  
39  
40  
41  
42  
43  
44  
45  
46  
47  
48  
49  
50  
51  
52  
53  
54  
55  
56  
57  
58  
59  
60

1  
2  
3  
4  
5  
6  
7  
8  
9  
10  
11  
12  
13  
14  
15  
16  
17  
18  
19  
20  
21  
22  
23  
24  
25  
26  
27  
28  
29  
30  
31  
32  
33  
34  
35  
36  
37  
38  
39  
40  
41  
42  
43  
44  
45  
46  
47  
48  
49  
50  
51  
52  
53  
54  
55  
56  
57  
58  
59  
60

380 **Funding statement**

381 This research received no specific grant from any funding agency in the public, commercial or not-for-  
382 profit sectors’.

383

For peer review only

1  
2  
3 384 **Competing interests statement**  
4  
5

6  
7 385 The authors have no competing interests other than being involved in reproductive immunology  
8  
9 386 research.  
10  
11  
12  
13  
14  
15  
16  
17  
18  
19  
20  
21  
22  
23  
24  
25  
26  
27  
28  
29  
30  
31  
32  
33  
34  
35  
36  
37  
38  
39  
40  
41  
42  
43  
44  
45  
46  
47  
48  
49  
50  
51  
52  
53  
54  
55  
56  
57  
58  
59  
60
